# Supplementary material for: ‘French LARS score’: validation of the French version of the low anterior resection syndrome (LARS) score for measuring bowel dysfunction after sphincter-preserving surgery among rectal cancer patients: a study protocol
Source: PubMed Central journal article supplement — BMJ Open. 2020 Mar 8;10(3):e034251. doi: 10.1136/bmjopen-2019-034251 (PMC7064062; doi:10.1136/bmjopen-2019-034251), 2020-03-08
Supplement: bmjopen-2019-034251.draft_revisions.pdf [file bmjopen-2019-034251.draft_revisions.pdf]

# BMJ Open

BMJ Open is committed to open peer review. As part of this commitment we make the peer review history of every article we publish publicly available.

When an article is published we post the peer reviewers' comments and the authors' responses online. We also post the versions of the paper that were used during peer review. These are the versions that the peer review comments apply to.

The versions of the paper that follow are the versions that were submitted during the peer review process. They are not the versions of record or the final published versions. They should not be cited or distributed as the published version of this manuscript.

BMJ Open is an open access journal and the full, final, typeset and author-corrected version of record of the manuscript is available on our site with no access controls, subscription charges or pay-per-view fees (<http://bmjopen.bmj.com>).

If you have any questions on BMJ Open's open peer review process please email [info.bmjopen@bmj.com](mailto:info.bmjopen@bmj.com)

# BMJ Open

**“The French LARS score”: Validation of the French version of the low anterior resection syndrome (LARS) score for measuring bowel dysfunction after sphincter-preserving surgery among rectal cancer patients**

|                               |                                                                                                                                                                                                                                                                                                                                                                                                                                                                                                                                                                                                        |
|-------------------------------|--------------------------------------------------------------------------------------------------------------------------------------------------------------------------------------------------------------------------------------------------------------------------------------------------------------------------------------------------------------------------------------------------------------------------------------------------------------------------------------------------------------------------------------------------------------------------------------------------------|
| Journal:                      | <i>BMJ Open</i>                                                                                                                                                                                                                                                                                                                                                                                                                                                                                                                                                                                        |
| Manuscript ID                 | bmjopen-2019-034251                                                                                                                                                                                                                                                                                                                                                                                                                                                                                                                                                                                    |
| Article Type:                 | Protocol                                                                                                                                                                                                                                                                                                                                                                                                                                                                                                                                                                                               |
| Date Submitted by the Author: | 12-Sep-2019                                                                                                                                                                                                                                                                                                                                                                                                                                                                                                                                                                                            |
| Complete List of Authors:     | Eid, Yassine; Centre Hospitalier Universitaire de Caen, digestive surgery; UMRS 1086,<br>Bouvier, Véronique; Cancers et préventions<br>Dejardin , Olivier; Cancers et préventions<br>Menahem, Benjamin; Centre Hospitalier Universitaire de Caen<br>Chaillot, Fabien; Centre Hospitalier Universitaire de Caen<br>Chene, Yannick; Centre Hospitalier Universitaire de Caen<br>Dutheil, Jean Jacques; Centre Hospitalier Universitaire de Caen<br>Juil, Therese; Aarhus Univ Hosp<br>Morello, Rémy; Centre Hospitalier Universitaire de Caen<br>Alves, Arnaud; Centre Hospitalier Universitaire de Caen |
| Keywords:                     | bowel dysfunction, rectal cancer, low anterior resection syndrome, colorectal functional outcome, quality of life, validation                                                                                                                                                                                                                                                                                                                                                                                                                                                                          |
|                               |                                                                                                                                                                                                                                                                                                                                                                                                                                                                                                                                                                                                        |

SCHOLARONE™  
Manuscripts

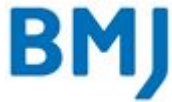

I, the Submitting Author has the right to grant and does grant on behalf of all authors of the Work (as defined in the below author licence), an exclusive licence and/or a non-exclusive licence for contributions from authors who are: i) UK Crown employees; ii) where BMJ has agreed a CC-BY licence shall apply, and/or iii) in accordance with the terms applicable for US Federal Government officers or employees acting as part of their official duties; on a worldwide, perpetual, irrevocable, royalty-free basis to BMJ Publishing Group Ltd ("BMJ") its licensees and where the relevant Journal is co-owned by BMJ to the co-owners of the Journal, to publish the Work in this journal and any other BMJ products and to exploit all rights, as set out in our [licence](#).

The Submitting Author accepts and understands that any supply made under these terms is made by BMJ to the Submitting Author unless you are acting as an employee on behalf of your employer or a postgraduate student of an affiliated institution which is paying any applicable article publishing charge ("APC") for Open Access articles. Where the Submitting Author wishes to make the Work available on an Open Access basis (and intends to pay the relevant APC), the terms of reuse of such Open Access shall be governed by a Creative Commons licence – details of these licences and which [Creative Commons](#) licence will apply to this Work are set out in our licence referred to above.

Other than as permitted in any relevant BMJ Author's Self Archiving Policies, I confirm this Work has not been accepted for publication elsewhere, is not being considered for publication elsewhere and does not duplicate material already published. I confirm all authors consent to publication of this Work and authorise the granting of this licence.

1  
2  
3 **“The French LARS score”: Validation of the French version of the low anterior**  
4 **resection syndrome (LARS) score for measuring bowel dysfunction after sphincter-**  
5 **preserving surgery among rectal cancer patients**  
6  
7  
8  
9  
10  
11

12 Eid Y<sup>1,2,3</sup>, Bouvier V<sup>2,4</sup>, Dejardin O<sup>2,3</sup>, Menahem B<sup>1,3</sup>, Chaillot F<sup>3</sup>, Chene Y<sup>3</sup>, Dutheil JJ<sup>3</sup>,  
13  
14 Juul T<sup>5</sup>, Morello R<sup>3,6</sup>, Alves A<sup>1,2,3</sup>  
15  
16

17 <sup>1</sup> Department of digestive surgery, University Hospital of Caen, Avenue de la Côte de Nacre,  
18 14032, Caen, Cedex, France  
19

20 <sup>2</sup> ANTICIPE" U1086 INSERM-University of Caen Normandy, Team « Ligue contre le Cancer »,  
21 Centre François Baclesse, Caen, France  
22  
23

24 <sup>3</sup> Department of research, University Hospital of Caen, Normandy, France  
25  
26

27 <sup>4</sup> University Hospital of Caen, Caen cedex, France; Digestive Cancer Registry of Calvados  
28

29 <sup>5</sup> Department of Surgery, Aarhus University Hospital, Aarhus, Denmark  
30  
31

32 <sup>6</sup> Department of biostatistics and clinical research, University Hospital of Caen, 14000 Caen  
33 cedex, France  
34  
35  
36  
37  
38

39 **Corresponding author**

40 Dr Yassine EID – [edyassine@hotmail.fr](mailto:edyassine@hotmail.fr) – CHU Caen, avenue de la Cote de Nacre, 14033,  
41  
42 Caen Cedex, France  
43  
44  
45  
46  
47  
48  
49  
50  
51  
52  
53  
54  
55  
56  
57  
58  
59  
60

## Abstract

**Introduction.** Many bowel problems following low anterior resection (LAR) for rectal cancer considerably impair the quality of life (QoL) for patients. The LAR Syndrome (LARS) scale is a self-completion questionnaire to identify and assess bowel dysfunction after rectal cancer surgery. The LARS scale has been translated and validated in several languages but not French (metropolitan French). The primary objective is to adapt the LARS scale to the French language (called French-LARS score) and to assess its psychometric properties. Secondary objectives are, first, to assess both the prevalence and severity of LARS and, second, to measure their impact on QoL.

**Methods and analysis.** A French multicentre observational cohort study was designed and has enrolled 400 patients. The validation study will include translation of the LARS scale following the current international recommendations; assessment of reliability, convergent and discriminant validities, sensitivity, internal consistency, internal validity; and confirmatory analyses. An analysis will be conducted to determine the correlation between the LARS score and the QLQ questionnaires (EORTC's QLQ-C30, QLQ-CR29). Risk factors linked to QoL deterioration will be identified, and their impact will be measured. This study will respond to the need for a validated tool to improve patient care and quality of life.

**Ethics and dissemination.** The institutional review board of the University Hospital of Caen and the ethics committee (CPP Nord Ouest I, January 25, 2019) approved the study. This study is supported by a grant from the French Ministry of Health (PHRC- K17-031). The institutional promoter is the University Hospital of Caen Department of Clinical Research and Innovation (DCRI).

**Trial registration number.** NCT03569488

1  
2  
3 **Strengths and limitations of this study.**  
4

- 5 - The validation of the French version of the LARS score (the French-LARS score) will allow  
6 the use of a scientific instrument to assess both the prevalence and severity of LARS in  
7 French language.  
8  
9  
10  
11  
12 - The French-LARS study is a multicentre cohort study of rectal cancer patients  
13 included from 34 units of colorectal surgery in France.  
14  
15  
16  
17 - Limitations include the use of non-probability sampling, which is expected to impose  
18 selection bias.  
19  
20  
21  
22  
23

24 **Word count of the manuscript : 3846**  
25  
26  
27

28 **Keywords:** bowel dysfunction, rectal cancer, low anterior resection syndrome, colorectal  
29 functional outcome, quality of life, validation  
30  
31  
32  
33  
34  
35  
36  
37  
38  
39  
40  
41  
42  
43  
44  
45  
46  
47  
48  
49  
50  
51  
52  
53  
54  
55  
56  
57  
58  
59  
60

## Manuscript

## Background

### *Rectal cancer management*

In recent years, progress in the multimodal treatments of rectal cancer (RC) has improved local disease control and increased the survival rate (up to 50% survival at 5 years) [1, 2]. At the same time, the evolution of surgical techniques and the achievement of a 1-cm distal margin below the tumour have pushed back the limits of sphincter-preserving surgery (SPS) without impairing oncological prognosis [3, 4]. In summary, up to 80% of patients with rectal cancer undergo SPS [5]. The assessment of RC outcome has traditionally focused on morbidity rate, tumour recurrence and survival, while functional sequelae (i.e., bowel and/or genitourinary impairment) have long been regarded as inherent to the nature of RC treatments [6, 7]. However, with improved surgical outcomes, we and others have observed a rising number of RC survivors who live with numerous potential side effects and, eventually, an impaired quality of life (QoL) [6-9]. Therefore, bowel function, like QoL, has become an increasingly important focus of care [10].

### *Bowel dysfunction following SPS*

It is widely accepted that as much as 50% to 90% of patients who have an SPS will have a subsequent change in bowel habit [11, 12]. The wide spectrum of bowel symptoms after resection with SPS has been termed the "low anterior resection syndrome (LARS)". The prevalence and severity of LARS remain difficult to assess. Several authors still consider faecal incontinence to be the foremost intestinal sequela, underscoring the impact of urgency and impaired evacuation.

1  
2  
3 LARS is defined as follows: frequent bowel movements (increased number of stools  
4 during the day and/or night), bowel fractionation (repeated passage of several stools over a  
5 few hours, sometimes requiring the patient to defecate four or five times in 1–2 h); disorders  
6 of continence from minimal gas leaks or staining to debilitating faecal incontinence and  
7 faecal urgency; and urgency (inability to prevent defecation for > 15 min when the need  
8 arises) [11, 12]. These symptoms usually appear immediately after surgery, become most  
9 pronounced during the first few months, improve somewhat thereafter, and reach a steady  
10 state after approximately one to two years [11, 12]. Recently, a pragmatic definition of LARS  
11 has been proposed: "disordered bowel function after rectal resection, leading to a detriment in  
12 QOL" [13].  
13  
14  
15  
16  
17  
18  
19  
20  
21  
22  
23  
24  
25  
26  
27  
28

### 29 ***Rationale for the use of the LARS score***

30 Although many questionnaires or instruments have been used to assess the impact of LARS  
31 on QoL, a recent systematic review and meta-analysis observed that 65% of the studies  
32 included did not use a validated assessment instrument [14]. Furthermore, there is  
33 heterogeneity of the assessment tools, namely, single examinations and different scoring  
34 systems, such as the Memorial Sloan Kettering Cancer Center (MSKCC), bowel function  
35 instrument (BFI), Wexner, St. Marks and FSFI scores. The majority of the instruments used  
36 to assess bowel function measured faecal incontinence and omitted other symptoms that have  
37 been shown to have a more significant correlation with quality of life, such as clustering and  
38 urgency [15]. Since 2012, a group of Danish authors have developed and validated a five-  
39 item instrument for the evaluation of LARS (the LARS score – supplementary file) [16]. The  
40 LARS score consists of five items: incontinence for flatus or for liquid stool, frequency of  
41 bowel movements, clustering of stools, and urgency. It allows the categorization of patients  
42 into 3 groups: no LARS (0-20 points), minor LARS (21-29 points), and major LARS (30-42  
43  
44  
45  
46  
47  
48  
49  
50  
51  
52  
53  
54  
55  
56  
57  
58  
59  
60



1  
2  
3 points) [16]. It represents the best questionnaire to capture anorectal postoperative function to  
4  
5 date. When faecal incontinence is the major concern, the Wexner, St. Marks or FSFI score  
6  
7 are adequate; the FSFI is more sound from a methodological viewpoint. While the MSKCC-  
8  
9 FBI is the best questionnaire for the evaluation of LARS, its use is complex. For this reason,  
10  
11 the LARS score is currently used preferentially for first-line evaluation [15]. The ability of  
12  
13 the LARS score to reflect the impact of bowel dysfunction on QOL was proven in its initial  
14  
15 validation and subsequently through its association with the EORTC QLQ-C30 scale [17]. In  
16  
17 clinical settings, the LARS score severity categories (No LARS, Minor LARS, and Major  
18  
19 LARS) can facilitate quick identification of patients most in need of treatment. Patients with  
20  
21 major LARS reported seriously compromised QOL and significantly worse QOL compared  
22  
23 with those with No/Minor LARS. Consequently, half of the patients restricted their diet and  
24  
25 limited social activity [17].  
26  
27  
28  
29

30  
31 In addition to the original Danish version, the LARS score has been translated into  
32  
33 several other languages (English, Dutch, Swedish, Spanish, German, and Chinese) and has  
34  
35 the capacity for widespread use [18-20].  
36  
37  
38  
39

### 40 ***Hypothesis and objectives of the investigations***

41  
42 Both the adoption of a uniform definition of LARS and the consistent use of the same  
43  
44 questionnaire allow researchers to pool and compare the results of different studies and  
45  
46 institutions. A validated French version of the LARS score is not yet available.  
47  
48

49 The main objective will be to adapt and validate the LARS scale questionnaire to the French  
50  
51 language (called French-LARS score) and assess its psychometric properties. Secondary  
52  
53 objectives are, first, to assess both the prevalence and severity of LARS and, second, to  
54  
55 measure their impact on QoL.  
56  
57  
58  
59  
60

## Methods

### *Study design*

The French-LARS study is an observational, multicentre, cohort study of rectal cancer patients who underwent curative sphincter-preserving surgery with partial or total mesorectal excision.

Patients are included from 34 units of colorectal surgery in France (see list of participating centres in the Acknowledgements section). The study has been approved by the scientific board of the French Research Group of Rectal Cancer Surgery (GRECCAR) group. This group was created by surgical teams in France who are involved in the management of rectal cancer with the aim of conducting and publishing multicentre clinical trials on the subject in high-level journals and expanding this surgical specialty to various learned societies. Most of the participating teams in the study are affiliated with the GRECCAR group. All investigators will proceed with this study in accordance with the Declaration of Helsinki.

### *Study population*

All patients provided written informed consent prior to their enrolment for study participation.

The patient inclusion and exclusion criteria are as follows:

#### Inclusion criteria

- Patients aged between 18 and 80 years
- Rectal cancer patients who underwent curative sphincter-preserving surgery with partial or total mesorectal excision
- Surgery performed between January 2007 and January 2017, with reversal of the defunctioning stoma before January 2017

- Bowel continuity restored for at least 24 months.
- Voluntary participation in the study

#### Exclusion criteria

- A palliative rectal cancer resection
- The presence of stoma
- Known disseminated or recurrent disease
- Cognition and/or language issues.

For patients lost to follow-up, an active search will be carried out with the general practitioners and, if necessary, with the birth councils in order to know the vital status.

Participants in the validation study will be identified through local databases by the investigators at each of the participating centres. They will be selected randomly from the pool of eligible subjects. Participants will be approached following a minimum duration of 24 months after surgery to allow their bowel function to have regained stability [11, 12, 17].

#### ***Data collected***

Demographic and clinical information will be obtained from the databases. Patient characteristics will be collected on e-CRFs (electronic Case Report Forms) and include age, sex, body mass index, tumour height (distance from anal verge on MRI or rigid sigmoidoscopy in centimetres), timing and type of neoadjuvant radiotherapy and chemotherapy if it was recommended; time since surgery; type of surgery (PME or TME); type of anastomosis; defunctioning stoma; and postoperative mortality and morbidity such as pelvic abscess, anastomotic leakage, and reoperation. Morbidity will be evaluated with the new classification of surgical complications by Dindo et al. [21], which includes 5 grades. The usual data will be recorded: distal and circumferential margins, the number of resected and invaded nodes, tumoural differentiation, the presence of vascular embols (venous or

1  
2  
3 lymphatic, intra- or extra-mural), perineural enhancement, and the quality of the mesorectal  
4 excision. The resected specimen will be staged according to American Joint Committee on  
5 Cancer (AJCC) criteria (7th version).  
6  
7  
8  
9

10 Data collection will be performed according to the following procedures. (i) The  
11 researchers will identify eligible participants by reviewing the medical records of rectal  
12 cancer patients. (ii) The eligible patients will be contacted by postal invitation and will be  
13 informed about the purpose of the study. (iii) The completed questionnaires will be carefully  
14 checked by the researchers for any missing information. The eligible patients will be  
15 contacted by postal invitation twice for lack of response. Any unclear item of missing  
16 information will be reconfirmed through a phone call. If this is not possible, the questionnaire  
17 will be considered invalid.  
18  
19  
20  
21  
22  
23  
24  
25  
26  
27  
28  
29  
30

### 31 ***Study end points***

32  
33 The primary objective is to validate a French-language version of the LARS score: to adapt  
34 the LARS scale questionnaire to the French language (called French-LARS score) and to  
35 assess its psychometric properties and factor structure.  
36  
37  
38  
39

40 The secondary objectives are, first, to assess both the prevalence and severity of  
41 LARS and, second, to measure their impact on QoL.  
42  
43  
44  
45  
46

### 47 ***Detailed description of the implemented techniques***

48  
49 The validation study of the French version of the LARS score is based on face and content  
50 validities as well as on the measurement of its psychometric properties in compliance with  
51 the standards published by the American Educational Research Association et al. [22].  
52  
53  
54  
55  
56  
57

### 58 ***Validation study of the French version***

### ***Translation process***

After obtaining permission from the original authors [18, 19], we will conduct the forward- and back-translation procedures in accordance with the translation guidelines provided by the authors.

The French-LARS questionnaire will be developed by translating the questions into French, a task that will be performed by two independent translators who are native French speakers with a high level of fluency. The two translators will check and discuss the two translations only for inconsistency and will establish a single preliminary French version. Thereafter, the French version will be back-translated into English by two independent professional translators; both are fluent in French and with English as their mother tongue, and both are unfamiliar with the background objectives of the study. Both versions of the backward translation will be compared with each other and with the initial version; after minor adjustments, a final French version will be agreed upon. The final French version and the whole translation process mentioned above will be sent to the original authors for approval.

### ***Content validity***

Assessment of content validity will be carried out by a panel of experts during the process that will lead to the final French version of the scale. Each expert will independently judge, by means of a Likert scale with 3 possible answers (poor, average and good), whether the content from the original LARS-score is preserved and adapted in the French language (see Acknowledgement).

### ***Face validity and perceived validity***

1  
2  
3 Then, a pilot study will be conducted. The French questionnaire (called French-LARS score)  
4 will be administered to 100 patients in order to verify the adequacy and degree of  
5  
6 comprehension of the questions (figure1). These patients will be chosen according to their  
7  
8 representativeness (i.e., a wide range of socio-demographic and clinical characteristics). In  
9  
10 total, male patients and female patients will be administered the questionnaire. These patients  
11  
12 with have primary education levels, secondary education levels, and college or higher  
13  
14 education levels. Patients will have tumour stages I, II and III.  
15  
16  
17  
18

19 Each patient using the French-LARS score will be asked to review the questionnaire  
20  
21 by precisely pointing out all of the difficulties encountered when using the instrument,  
22  
23 including:  
24  
25

- 26 • items that are ambiguous or badly formulated
- 27
- 28 • difficulties or confusion completing the scale
- 29

30 Each patient will be asked to indicate whether the questionnaire is acceptable and  
31  
32 easy to understand.  
33  
34  
35  
36  
37

### 38 ***Reliability***

39  
40 Reproducibility will be investigated by a test-retest procedure. A randomly selected subgroup  
41  
42 of participants (n= 400) will be sent the French-LARS score questionnaire twice (figure1).  
43  
44 The second test will be sent to the participants one or two weeks after the completion of the  
45  
46 first test. Patients will be asked if they have experienced any significant change in bowel  
47  
48 function between the first and the second test. Those confirming a change in bowel function  
49  
50 will be excluded from the test-retest analysis. Non-responders will be further contacted twice,  
51  
52 either via postal invitation or by phone. The test-retest study will be performed by comparing  
53  
54 the French-LARS scores obtained at the two time points. The test-retest reliability of the  
55  
56 questionnaire will be assessed by Cohen's Kappa coefficient (no LARS, minor LARS and  
57  
58  
59  
60

1  
2  
3 major LARS scores) or by intra-class correlation coefficient, ICC (quantitative LARS score).

4  
5 Internal consistency will be estimated by the Cronbach alpha coefficient.

### 6 7 8 ***Convergent validity***

9  
10 The convergent validity will notably be determined in this study by computing the  
11 correlations between the French-LARS score and the EORTC QLQ-C30 and QLQ-CR29  
12 domains [23], which have been globally accepted and widely used as valid instruments for  
13 measuring QoL. Thus, eligible patients will receive a postal invitation to complete the  
14 EORTC QLQ-C30 and QLQ-CR29 along with the French-LARS scores. Furthermore, to  
15 study the convergent validity between qualitative measures of the LARS scores (no LARS,  
16 minor LARS and major LARS) and quality of life, the patients will be asked a general  
17 question [16, 19]: “Overall, how much does your bowel function affect your quality of life?”  
18 Four mutually exclusive responses, “not at all”, “very little”, “somewhat” or “a lot”, will be  
19 proposed.  
20  
21  
22  
23  
24  
25  
26  
27  
28  
29  
30  
31  
32  
33  
34

### 35 36 ***Discriminant validity***

37 With regard to the scoring instructions for these two instruments, a high score represents a  
38 high QoL or a high level of functioning for the global QoL subscale and functional subscale.  
39 However, for a symptom subscale/item, the higher the score, the more severe the symptom.  
40 The ability to discriminate between patients with different clinical characteristics is necessary  
41 for an instrument to be considered valid. For discriminant validity testing, we will use known  
42 variables, including gender, age, neoadjuvant radiation therapy, distance of the tumour from  
43 the anal verge, prior temporary stoma, length of postoperative period (time since stoma-free  
44 rectal resection surgery or reversal surgery from temporary stoma) and postoperative septic  
45 complications such as pelvic abscess or anastomotic leakage. These variables are known to  
46 affect bowel function after SPS in rectal cancer patients [11-13, 24]. The following numeric  
47  
48  
49  
50  
51  
52  
53  
54  
55  
56  
57  
58  
59  
60

1  
2  
3 variables will be changed into binary variables: age, distance of the tumour from the anal  
4 verge, and length of the postoperative period; the median value for each will serve as the  
5  
6 cutoff point. Radiotherapy and prior temporary stoma will be treated as dichotomous  
7  
8 variables: no treatment at all versus treatment. The EORTC will provide us with and  
9  
10 authorize our use of the French version of the two questionnaires.  
11  
12  
13  
14  
15  
16

### 17 ***Sensitivity of the items***

18  
19 A search for the ceiling or floor effects will be systematically be made.  
20  
21  
22

### 23 ***Internal consistency***

24  
25 Internal consistency will be assessed using Cronbach's alpha coefficient.  
26  
27  
28  
29

### 30 ***Internal validity***

31  
32 A factorial analysis will allow verification of the internal structure of the scale. The statistical  
33  
34 method used is described below.  
35  
36  
37  
38  
39

### 40 ***Confirmatory analysis***

41  
42 A confirmatory analysis will be conducted to evaluate the recognized structural validity of  
43  
44 the scale in regard to its first edition.  
45  
46  
47  
48

### 49 ***Statistical analysis***

50  
51 Quantitative variables will be expressed as the mean  $\pm$  standard deviation (SD), and  
52  
53 qualitative variables will be expressed as the number of patients and percentages.  
54  
55

56 The experimental design of the study leads to the same patient being seen several  
57  
58 times during his oncology follow-up. However, apart from the subgroup of patients who  
59  
60



1  
2  
3 participate in the study of repeatability, each patient will complete only one questionnaire in  
4  
5 the study.  
6

7  
8 The comparisons between the mean scores of the three groups (no LARS, minor  
9  
10 LARS or major LARS) will be carried out with the help of an analysis of variance or a  
11  
12 Kruskal-Wallis test depending on whether the data follow the verified homoscedasticity  
13  
14 hypothesis or not. The post hoc comparisons will rely on the Bonferroni correction or the  
15  
16 Nemenyi test.  
17

18  
19 The factor analysis will rely on a principal component analysis. The selected factors  
20  
21 will correspond to an eigenvalue  $\geq 1$ .  
22

23  
24 The repeatability test (test-retest), in which 400 patients will be asked to complete the  
25  
26 F-LARSF-LARSF-LARS twice within 15 days will use the student's *t*-test for repeated  
27  
28 measurements and, with the help of the intraclass correlation coefficient (ICC) and its 95%  
29  
30 CI, will use the ANOVA for random effects models. After estimating the various components  
31  
32 of the total variance, the ICC will be calculated in the usual manner. A graphic representation  
33  
34 from Bland and Altman will show the level of agreement of the repeatability test.  
35  
36

37  
38 The sensitivity and specificity of the French-LARS score in predicting the impact on  
39  
40 quality of life (QoL) will be assessed by receiver operating characteristic (ROC) curves of the  
41  
42 score versus groups reporting no/minor or some/major impact on QoL.  
43

44  
45 The correlation between the LARS validated score and the QLQ questionnaires  
46  
47 (EORTC's QLQ-C30, QLQ-CR29) will be estimated with the Pearson correlation coefficient  
48  
49 as well as with the Spearman correlation coefficient and its 95% confidence interval.  
50

51  
52 The inclusion of the data indicating the impact of LARS on quality of life will be  
53  
54 based on a univariate approach and then a multivariate approach using ad hoc models  
55  
56 following the nature of the dependent variable (binary or multinomial logistic regression or  
57  
58 linear regression depending on whether the quality of life score is considered qualitative or  
59  
60

1  
2  
3 quantitative). Only variables whose level of significance in the univariate analysis is  $p < 0.15$   
4  
5 will be included in the multivariate model. This approach will enable the individualization of  
6  
7 the risk factors linked to a deterioration of the quality of life and an evaluation their impact.  
8  
9

10 The confirmatory analysis will rely on structural equation models that enable the  
11  
12 validation of the measurement structure of various concepts.  
13

14 All of the tests will be two-sided with a level of significance ( $p$ ) that equals 0.05.  
15  
16 IBM®-SPSS® 22.0 and AMOS for Windows® software will allow the calculations.  
17  
18

### 21 ***Feasibility***

22  
23 Thirty-four colorectal cancer centres, including both university hospitals and cancer control  
24  
25 centres, gave their consent to include between 50 and 100 patients who had undergone SPS  
26  
27 from 2007 to 2017 (see the list of participating centres in the Acknowledgements section).  
28  
29 The availability of patients for study inclusion from each GRECCAR's team has been  
30  
31 demonstrated in published randomized studies [25-28]). We chose to include patients who  
32  
33 underwent SPS between 2007 and 2017 for two reasons. First, the French recommendations  
34  
35 for clinical practice and therapeutic choices for rectal cancer were published after 2007,  
36  
37 which make the diagnoses and therapeutic strategies homogeneous [10]. Second, participants  
38  
39 were approached a minimum of 24 months after surgery to allow their bowel function to have  
40  
41 regained stability [11, 18, 19]. Finally, eligible participants are usually monitored in each  
42  
43 centre at regular intervals to screen for local recurrence and/or distant metastasis. For all of  
44  
45 these reasons, approximately 3000 patients will be contacted in order to include more than  
46  
47 1000 patients, expecting a 33% response rate.  
48  
49  
50  
51  
52  
53  
54  
55

### 56 ***Registration***

57  
58  
59  
60

1  
2  
3 The data will be collected and registered in e-CRFs by a dedicated local technical research  
4 team using the Ennov Clinical software.  
5  
6  
7  
8  
9

### 10 ***Study organization***

11  
12 Promotion of this study will be performed by the University Hospital of Caen, France. The  
13 study is funded, thanks to the financial support received from the Program for Hospital  
14 Clinical Cancer Research “**INCa-DGOS\_12112**”.  
15  
16  
17  
18  
19  
20

### 21 ***Duration and timeline***

22  
23 Patients will be included during 12 months. The protocol approval from the ethical  
24 committee, financial support, and e-CRFs were developed in 2018 and 2019. Recruitment of  
25 the patients is planned to continue until the first semester of 2021. The database will be  
26 closed in 2021, after which data analysis, manuscript writing, and submission for publication  
27 will follow (figure 2).  
28  
29  
30  
31  
32  
33  
34  
35  
36  
37

### 38 ***Ethics***

39  
40 The institutional review board of the University Hospital of Caen and the ethics committee  
41 (CPP Nord Ouest I, January 25, 2019) approved the study. The French-LARS study was  
42 registered on January 28, 2019, on the ClinicalTrials.gov Web site with trial identification  
43 number NCT03569488. This study is supported by a grant from the French Ministry of  
44 Health (PHRC- K17-031). The institutional promoter is the University Hospital of Caen  
45 Department of Clinical Research and Innovation (DCRI).  
46  
47  
48  
49  
50  
51  
52  
53  
54  
55

### 56 **Discussion**

1  
2  
3 Although the prevalence and severity of LARS remain difficult to assess, the LARS score,  
4 which has been developed and validated for seven years, represents the best questionnaire to  
5 capture anorectal postoperative function to date [15]. However, a validated French version of  
6 the LARS score is not yet available. This instrument (the French-LARS score) will allow for  
7 the development of future research and clinical practice in France. LARS remains a major  
8 problem, but it is not well understood among healthcare professionals, and it is frequently  
9 underestimated. Furthermore, there is considerable discrepancy between the clinician's  
10 judgement of patient perception and the patient's actual view or experience [25, 26]. For  
11 example, specialists tend to overestimate the impact of incontinence and frequent bowel  
12 movements, while they underestimate the impact of urgency and clustering [25]. Therefore,  
13 knowledge of therapeutic options such as transanal irrigation, biofeedback, or sacral nerve  
14 stimulation for patients with LARS is limited [27-29]. These recent studies have indicated  
15 that there is a need for improved LARS education for clinicians [25, 26]. There is now  
16 evidence that both the distribution of patients within different LARS groups (minor and/or  
17 major) and the impact of LARS on QoL did not change over time [30]. According to recent  
18 studies [31], nearly 50% of patients still experienced major LARS 13 to 15 years after  
19 surgery. Interestingly, only major LARS has an impact on the patients' QoL [32].

20  
21  
22 A 2019 survey highlights the notable functional consequences reported by RC  
23 survivors after SPS surgery [33]. Based on validated instruments, 40% of RC survivors  
24 suffered from a major LARS episode that significantly impaired their quality of life. More  
25 interestingly, bowel dysfunction was the only predictor of QoL for such patients after  
26 adjustment for age and different QoL components (urinary and sexual function) [33].

27  
28  
29 The validation of the French LARS score will allow us to use a scientific instrument  
30 that might be used in daily clinical practice not only to identify patients with elevated LARS  
31 scores but also to predict bowel dysfunction for prevention and rapid management. It will  
32  
33  
34  
35  
36  
37  
38  
39  
40  
41  
42  
43  
44  
45  
46  
47  
48  
49  
50  
51  
52  
53  
54  
55  
56  
57  
58  
59  
60

1  
2  
3 hopefully lead to improve clinician awareness in order to improve both the prevention and  
4 treatment of bowel dysfunction and the information given to patients. In the future, we will  
5 be able to develop a new patient-led follow-up programme based on symptom burden and  
6 health-related QoL.  
7  
8  
9  
10  
11

12 In this way, a recently published nomogram “the POLARS score” was developed to  
13 predict bowel dysfunction severity prior to anterior resection [34]. Theoretically, this tool  
14 allows clinicians to personalize care during multidisciplinary team meetings, to prepare  
15 patients for the consequences of treatment, and to guide the treatment decision with patient  
16 consent.  
17  
18  
19  
20  
21  
22

23 Another alternative strategy for high-risk patients called the “watch-and-wait” policy  
24 has been proposed in cases of complete clinical response following chemo-radiation therapy.  
25 Although this strategy provides fewer functional problems than rectal resection, major LARS  
26 symptoms have been reported in up to one-third of these patients [35]. However, there is, to  
27 date, insufficient evidence to draw firm conclusions on the oncological safety of this  
28 approach.  
29  
30  
31  
32  
33  
34  
35  
36

37 In summary, the validation of the French version of the LARS score (the French-  
38 LARS score) will allow the use of a scientific instrument to assess both the prevalence and  
39 severity of LARS.  
40  
41  
42  
43

44 Together with the oncological data, it will be important to discuss functional  
45 outcomes with patients as well.  
46  
47  
48  
49  
50  
51  
52  
53  
54  
55  
56  
57  
58  
59  
60

**List of abbreviations**

C30 : Core 30

CR 29 : Colo Rectal 29

CRF : Case Report Form

DCRI : Department of Clinical Research and Innovation

eCRF : electronic Case Report Form

EORTC : European Organization for Treatment and Research of Cancer

FSFI : Female Sexual Function Index

ICC : Intraclass Correlation Coefficient

QLQ : Quality of Life Questionnaire

LARS : Low Anterior Resection Syndrom

MSKCC : Memorial Sloan Kettering Cancer Center

PME : Partial Mesorectal Excision

POLARS : Pre-Operative Low Anterior Resection Syndrom

QoL : quality of life

RC : Rectal Cancer

SD : Standard Deviation

SPS : Sphincter-preserving surgery

TME : Total Mesorectal Excision

### *Acknowledgements*

The authors thank Cathy Gaillard from the Clinical Research Unit of Caen University Hospital for their practical help with the study.

The authors would also such as to thank the participating centres: Pr BERDAH Stéphane, Dr BEYER-BERJOT Laura, Hôpital Nord, Marseille. Pr PANIS Yves, Dr MAGGIORI Leon, CHU Beaujon, Clichy. Dr DUMONT Frédéric, Institut de Cancérologie de l'Ouest, Nantes. Dr DUBOIS Anne, CHU Estaing, Clermont-Ferrand. Pr RULLIER Eric, Dr DENOST Quentin, CHU Bordeaux Hôpital Saint André. Pr TUECH Jean-Jacques, Dr BRIDOUX Valérie, CHU de Rouen. Pr KAROUI Mehdi, Dr MANCEAU Gilles, CHU Pitié-Salpêtrière, Paris. Pr PIESSEN Guillaume, CHU Lille. Pr COTTE Eddy, CHU Lyon Sud. Dr JAFARI Merdhad, Centre Oscar Lambret, Lille. Dr DENET Christine, Institut Mutualiste Montsouris, Paris. Dr POL Bernard, Hôpital Saint Joseph, Marseille. Dr CHOULLARD Elie, CH Poissy et Saint-Germain-en-Laye. Pr BENOIST Stéphane, Pr BROUQUET Antoine, CHU de Bicêtre. Pr PARC Yann, Pr LEFEVRE Jérémie, Hôpital Saint-Antoine. Pr FAUCHERON Jean-Luc, CHU de Grenoble. Pr ROUANET Philippe, Institut Régional du Cancer, Montpellier. Dr LORIAU Jérôme, CH Saint-Joseph, Paris. Pr POCARD Marc, Dr EVENO Clarisse, Hôpital Lariboisière, Paris. Dr DESOLNEUX Grégoire Institut Bergonié, Bordeaux. Dr LAKKIS Zaher, CHU de Besançon. Pr PRUDHOMME Michel, CHU de Nîmes. Pr REGIMBEAU Jean Marc, PR SABBAGH Charles, CHU d'Amiens. Pr OUAISSI Mehdi, CHU de Tours. Pr SIELEZNEFF Igor, Dr MEGE Diane, CHU Timone, Marseille. Dr BADIC Bogdan, CHU de Brest. Pr BRESLER Laurent, Pr, CHU Brabois Nancy. Dr BENHAIM Leonor, Institut Gustave Roussy, Villejuif. Pr MEUNIER Bernard, CHU Rennes. Pr ROHR Serge, Dr ROMAIN Benoît, CHU Hautepierre Strasbourg. Dr MARCHAL Frédéric. Institut de cancérologie de Lorraine, Nancy. Dr LELONG Bernard, Dr de

1  
2  
3 CHAISEMARTIN Cécile, Institut Paoli Calmette, Marseille. Pr BERGER Anne, Hôpital  
4  
5 Georges POMPIDOU, Paris. Dr d'ANGELIS Nicolas, Hôpital Henri Mondor, Créteil.  
6  
7

8 We would like to thank Frederic Bretagnol, Laurent Siproudhis, François Pigot, and  
9  
10 Amelie Anota for their help in obtaining the final French version of the scale.  
11  
12  
13

### 14 ***Author Contributions***

15  
16 Study conception and design: AA, VB, RM, YE. Intervention design: RM, AA, VB, YE,  
17  
18 JJD, FC, YC, JJD, BM and YE. Analysis of data will be done by YE, OD and RM.  
19  
20  
21 AA drafted the work and was revised critically for intellectual content by TJ. All authors  
22  
23 gave final approval of this version to be published.  
24  
25

### 26 ***Funding***

27  
28 The study is funded, thanks to the financial support received from the Program for Hospital  
29  
30 Clinical Cancer Research “INCa-DGOS\_12112”.  
31  
32

### 33 ***Competing interests***

34  
35 None declared.  
36  
37  
38  
39  
40  
41  
42  
43  
44  
45  
46  
47  
48  
49  
50  
51  
52  
53  
54  
55  
56  
57  
58  
59  
60



## References

1. Ferlay J, Steliarova-Foucher E, Lortet-Tieulent J, Rosso S, Coebergh JW, Comber H, et al. Cancer incidence and mortality patterns in Europe: estimates for 40 countries in 2012. *Eur J Cancer*. 2013;49:1374-403.
2. Siegel RL, Miller KD, Fedewa SA, Ahnen DJ, Meester RGS, Barzi A, et al. Colorectal cancer statistics, 2017. *CA Cancer J Clin*. 2017;67:177-93.
3. Lakkis Z, Manceau G, Bridoux V, Brouquet A, Kirzin S, Maggiori L, et al. Management of rectal cancer: the 2016 French guidelines. *Colorectal Dis*. 2017;19:115-22.
4. Rullier E, Laurent C, Bretagnol F, Rullier A, Vendrely V, Zerbib F. Sphincter-saving resection for all rectal carcinomas: the end of the 2-cm distal rule. *Ann Surg*. 2005;241:465-9.
5. Chau A, Maggiori L, Debove C, Kanso F, Hennequin C, Panis Y. Toward the end of abdominoperineal resection for rectal cancer? An 8-year experience in 189 consecutive patients with low rectal cancer. *Ann Surg*. 2014;260:801-5; discussion 805-6.
6. Sarcher T, Dupont B, Alves A, Menahem B. Anterior resection syndrome: what should we tell practitioners and patients in 2018? *J Visc Surg*. 2018;155:383-91.
7. Abdelli A, Tillou X, Alves A, Menahem B. Genito-urinary sequelae after carcinological rectal resection: what to tell patients in 2017. *J Visc Surg*. 2017;154:93-104.
8. Wiltink LM, Marijnen CA, Kranenbarg EMK, van de Velde CJ, Nout RA. A comprehensive longitudinal overview of health-related quality of life and symptoms after treatment for rectal cancer in the TME trial. *Acta Oncol*. 2016;55:502-8.

- 1  
2  
3 9. Krouse RS, Wendel CS, Garcia DO, Grant M, Temple LKF, Going SB, et al. Physical  
4 activity, bowel function, and quality of life among rectal cancer survivors. *Qual Life*  
5  
6 *Res.* 2017;26:3131-42.  
7
- 8  
9  
10 10. Alves A. Recommendations for clinical practice. Therapeutic choices for rectal  
11  
12 cancer. How can we reduce therapeutic sequelae and preserve quality of life?  
13  
14 *Gastroenterol Clin Biol.* 2007;31:1S52-62, 1S95-7.  
15
- 16  
17 11. Bryant CL, Lunniss PJ, Knowles CH, Thaha MA, Chan CL. Anterior resection  
18  
19 syndrome. *Lancet Oncol.* 2012;13:e403-8.  
20
- 21  
22 12. Ziv Y, Zbar A, Bar-Shavit Y, Igov I. Low anterior resection syndrome (LARS): cause  
23  
24 and effect and reconstructive considerations. *Tech Coloproctol.* 2013;17:151-62.  
25
- 26  
27 13. Keane C, Wells C, O'Grady G, Bissett IP. Defining low anterior resection syndrome:  
28  
29 a systematic review of the literature. *Colorectal Dis.* 2017;19:713-22.  
30
- 31  
32 14. Scheer AS, Boushey RP, Liang S, Doucette S, O'Connor AM, Moher D. The long-  
33  
34 term gastrointestinal functional outcomes following curative anterior resection in  
35  
36 adults with rectal cancer: a systematic review and meta-analysis. *Dis Colon Rectum.*  
37  
38 2011;54:1589-97.  
39
- 40  
41 15. Chen TY, Emmertsen KJ, Laurberg S. What are the best questionnaires to capture  
42  
43 anorectal function after surgery in rectal cancer? *Curr Colorectal Cancer Rep.*  
44  
45 2015;11:37-43.  
46
- 47  
48 16. Emmertsen KJ, Laurberg S. Low anterior resection syndrome score: development and  
49  
50 validation of a symptom-based scoring system for bowel dysfunction after low  
51  
52 anterior resection for rectal cancer. *Ann Surg.* 2012;255:922-8.  
53
- 54  
55 17. Emmertsen KJ, Laurberg S, Rectal Cancer Function Study Group. Impact of bowel  
56  
57 dysfunction on quality of life after sphincter-preserving resection for rectal cancer. *Br*  
58  
59 *J Surg.* 2013;100:1377-87.  
60

- 1  
2  
3 18. Juul T, Ahlberg M, Biondo S, Emmertsen KJ, Espin E, Jimenez LM, et al.  
4  
5 International validation of the low anterior resection syndrome score. *Ann Surg.*  
6  
7 2014;259:728-34.  
8  
9
- 10 19. Juul T, Battersby NJ, Christensen P, Janjua AZ, Branagan G, Laurberg S, et al.  
11  
12 Validation of the English translation of the low anterior resection syndrome score.  
13  
14 *Colorectal Dis.* 2015;17:908-16.  
15  
16
- 17 20. Hou XT, Pang D, Lu Q, Yang P, Jin SL, Zhou YJ, et al. Validation of the Chinese  
18  
19 version of the low anterior resection syndrome score for measuring bowel dysfunction  
20  
21 after sphincter-preserving surgery among rectal cancer patients. *Eur J Oncol Nurs.*  
22  
23 2015;19:495-501.  
24  
25
- 26 21. Dindo D, Demartines N, Clavien PA. Classification of surgical complications: a new  
27  
28 proposal with evaluation in a cohort of 6336 patients and results of a survey. *Ann*  
29  
30 *Surg.* 2004;240:205-13.  
31  
32
- 33 22. American Educational Research Association, American Psychological Association,  
34  
35 National Council on Measurement in Education, Joint Committee on Standards for  
36  
37 Educational & Psychological Testing (US). *Standards for educational and*  
38  
39 *psychological testing.* Washington, DC: American Educational Research Association;  
40  
41 2014.  
42  
43
- 44 23. Wong CK, Chen J, Yu CL, Sham M, Lam CL. Systematic review recommends the  
45  
46 European organization for research and treatment of cancer colorectal cancer-specific  
47  
48 module for measuring quality of life in colorectal cancer patients. *J Clin Epidemiol.*  
49  
50 2015;68:266-78.  
51  
52
- 53 24. Hain E, Manceau G, Maggiori L, Mongin C, Prost ALDJ, Panis Y. Bowel dysfunction  
54  
55 after anastomotic leakage in laparoscopic sphincter-saving operative intervention for  
56  
57  
58  
59  
60

- 1  
2  
3 rectal cancer: a case-matched study in 46 patients using the low anterior resection  
4 score. *Surgery*. 2017;161:1028-39.  
5  
6  
7  
8 25. Chen TY, Emmertsen KJ, Laurberg S. Bowel dysfunction after rectal cancer  
9 treatment: a study comparing the specialist's versus patient's perspective. *BMJ Open*.  
10 2014;4:e003374.  
11  
12  
13  
14 26. Jimenez-Gomez LM, Espin-Basany E, Marti-Gallostra M, Sanchez-Garcia JL,  
15 Vallribera-Valls F, Armengol-Carrasco M. Low anterior resection syndrome: a survey  
16 of the members of the American Society of Colon and Rectal Surgeons (ASCRS), the  
17 Spanish Association of Surgeons (AEC), and the Spanish Society of Coloproctology  
18 (AECP). *Int J Colorectal Dis*. 2016;31:813-23.  
19  
20  
21  
22  
23  
24  
25  
26 27. Maris A, Devreese AM, D'Hoore A, Penninckx F, Staes F. Treatment options to  
27 improve anorectal function following rectal resection: a systematic review. *Colorectal*  
28 *Dis*. 2013;15:e67-78.  
29  
30  
31  
32  
33 28. Visser WS, Te Riele WW, Boerma D, van Ramshorst B, van Westreenen HL. Pelvic  
34 floor rehabilitation to improve functional outcome after a low anterior resection: a  
35 systematic review. *Ann Coloproctol*. 2014;30:109-14.  
36  
37  
38  
39  
40 29. Ramage L, Qiu S, Kontovounisios C, Tekkis P, Rasheed S, Tan E. A systematic  
41 review of sacral nerve stimulation for low anterior resection syndrome. *Colorectal*  
42 *Dis*. 2015;17:762-71.  
43  
44  
45  
46  
47 30. Pieniowski EHA, Palmer GJ, Juul T, Lagergren P, Johar A, Emmertsen KJ, et al. Low  
48 anterior resection syndrome and quality of life after sphincter-sparing rectal cancer  
49 surgery: a long-term longitudinal follow-up. *Dis Colon Rectum*. 2019;62:14-20.  
50  
51  
52  
53  
54 31. Chen TY, Wiltink LM, Nout RA, Kranenbarg EMK, Laurberg S, Marijnen CA, et al.  
55 Bowel function 14 years after preoperative short-course radiotherapy and total  
56  
57  
58  
59  
60

- 1  
2  
3 mesorectal excision for rectal cancer: report of a multicenter randomized trial. Clin  
4  
5 Colorectal Cancer. 2015;14:106-14.  
6  
7  
8 32. Juul T, Ahlberg M, Biondo S, Espin E, Jimenez LM, Matzel KE, et al. Low anterior  
9  
10 resection syndrome and quality of life: an international multicenter study. Dis Colon  
11  
12 Rectum. 2014;57:585-91.  
13  
14  
15 33. Eid Y, Bouvier V, Menahem B, Thobie A, Dolet N, Finochi M, et al. Digestive and  
16  
17 genitourinary sequelae in rectal cancer survivors and their impact on health-related  
18  
19 quality of life: outcome of a high-resolution population-based study. Surgery. 2019;.  
20  
21 doi:10.1016/j.surg.2019.04.007.  
22  
23  
24 34. Battersby NJ, Bouliotis G, Emmertsen KJ, Juul T, Glynne-Jones R, Branagan G, et al.  
25  
26 Development and external validation of a nomogram and online tool to predict bowel  
27  
28 dysfunction following restorative rectal cancer resection: the POLARS score. Gut.  
29  
30 2018;67:688-96.  
31  
32  
33 35. Hupkens BJP, Martens MH, Stoot JH, Berbee M, Melenhorst J, Beets-Tan RG, et al.  
34  
35 Quality of life in rectal cancer patients after chemoradiation: watch-and-wait policy  
36  
37 versus standard resection - a matched-controlled study. Dis Colon Rectum.  
38  
39 2017;60:1032-40.  
40  
41  
42  
43  
44  
45  
46  
47  
48  
49  
50  
51  
52  
53  
54  
55  
56  
57  
58  
59  
60

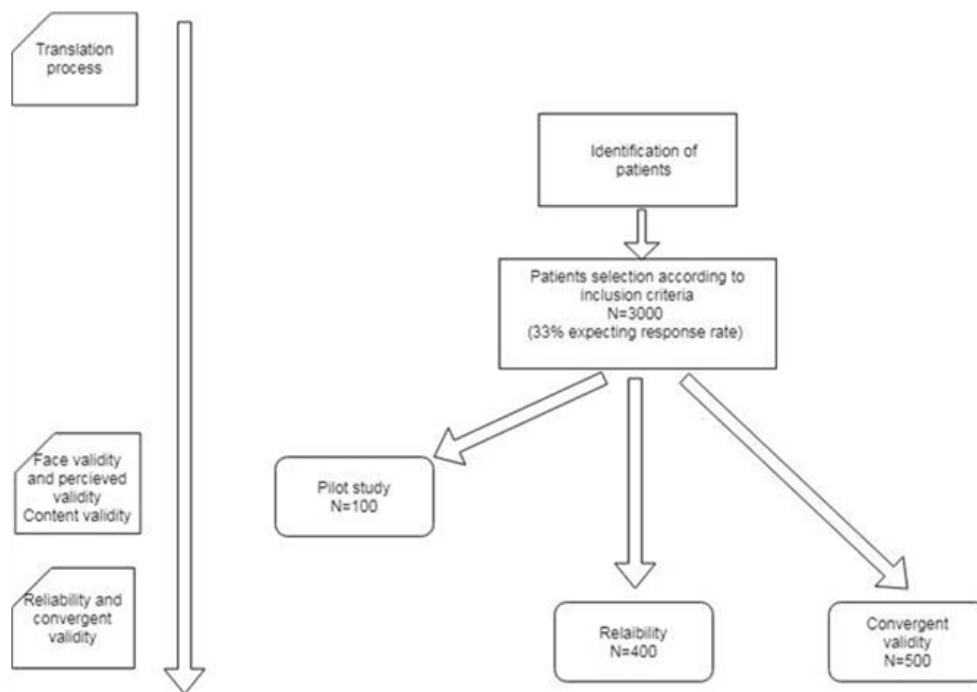

Figure 1 -Consort Diagram: Flow of the participants throughout the study

144x100mm (120 x 120 DPI)

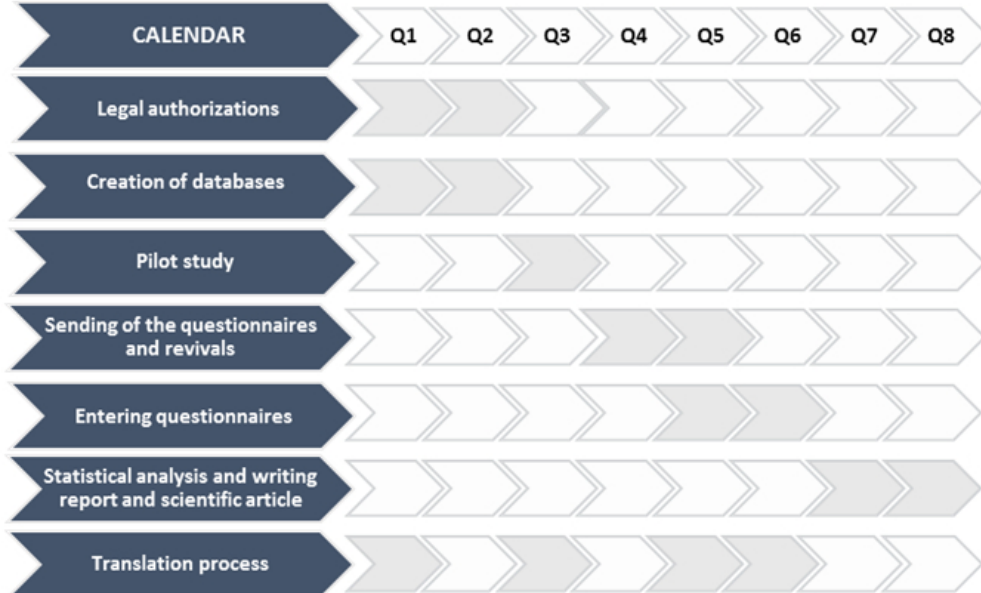

Figure 2 - Forecasting steps adapted to the study

142x86mm (120 x 120 DPI)

1  
2  
3  
4  
5  
6  
7  
8  
9  
10  
11  
12  
13  
14  
15  
16  
17  
18  
19  
20  
21  
22  
23  
24  
25  
26  
27  
28  
29  
30  
31  
32  
33  
34  
35  
36  
37  
38  
39  
40  
41  
42  
43  
44  
45  
46  
47  
48  
49  
50  
51  
52  
53  
54  
55  
56  
57  
58  
59  
60

## The LARS Score - Scoring Instructions

Add the scores from each 5 questions to one final score.

---

### Do you ever have occasions when you cannot control your flatus (wind)?

- |                                                       |          |
|-------------------------------------------------------|----------|
| <input type="checkbox"/> No, never                    | <b>0</b> |
| <input type="checkbox"/> Yes, less than once per week | <b>4</b> |
| <input type="checkbox"/> Yes, at least once per week  | <b>7</b> |

### Do you ever have any accidental leakage of liquid stool?

- |                                                       |          |
|-------------------------------------------------------|----------|
| <input type="checkbox"/> No, never                    | <b>0</b> |
| <input type="checkbox"/> Yes, less than once per week | <b>3</b> |
| <input type="checkbox"/> Yes, at least once per week  | <b>3</b> |

### How often do you open your bowels?

- |                                                               |          |
|---------------------------------------------------------------|----------|
| <input type="checkbox"/> More than 7 times per day (24 hours) | <b>4</b> |
| <input type="checkbox"/> 4-7 times per day (24 hours)         | <b>2</b> |
| <input type="checkbox"/> 1-3 times per day (24 hours)         | <b>0</b> |
| <input type="checkbox"/> Less than once per day (24 hours)    | <b>5</b> |

### Do you ever have to open your bowels again within one hour of the last bowel opening?

- |                                                       |           |
|-------------------------------------------------------|-----------|
| <input type="checkbox"/> No, never                    | <b>0</b>  |
| <input type="checkbox"/> Yes, less than once per week | <b>9</b>  |
| <input type="checkbox"/> Yes, at least once per week  | <b>11</b> |

### Do you ever have such a strong urge to open your bowels that you have to rush to the toilet?

- |                                                       |           |
|-------------------------------------------------------|-----------|
| <input type="checkbox"/> No, never                    | <b>0</b>  |
| <input type="checkbox"/> Yes, less than once per week | <b>11</b> |
| <input type="checkbox"/> Yes, at least once per week  | <b>16</b> |

**Total Score:**

\_\_\_\_\_  
=====

### Interpretation:

- 0-20: No LARS**  
**21-29: Minor LARS**  
**30-42: Major LARS**



# BMJ Open

## **“The French LARS score”: Validation of the French version of the low anterior resection syndrome (LARS) score for measuring bowel dysfunction after sphincter-preserving surgery among rectal cancer patients: a study protocol**

|                                 |                                                                                                                                                                                                                                                                                                                                                                                                                                                                                                                                                                                                        |
|---------------------------------|--------------------------------------------------------------------------------------------------------------------------------------------------------------------------------------------------------------------------------------------------------------------------------------------------------------------------------------------------------------------------------------------------------------------------------------------------------------------------------------------------------------------------------------------------------------------------------------------------------|
| Journal:                        | <i>BMJ Open</i>                                                                                                                                                                                                                                                                                                                                                                                                                                                                                                                                                                                        |
| Manuscript ID                   | bmjopen-2019-034251.R1                                                                                                                                                                                                                                                                                                                                                                                                                                                                                                                                                                                 |
| Article Type:                   | Protocol                                                                                                                                                                                                                                                                                                                                                                                                                                                                                                                                                                                               |
| Date Submitted by the Author:   | 21-Dec-2019                                                                                                                                                                                                                                                                                                                                                                                                                                                                                                                                                                                            |
| Complete List of Authors:       | Eid, Yassine; Centre Hospitalier Universitaire de Caen, digestive surgery; UMRS 1086,<br>Bouvier, Véronique; Cancers et préventions<br>Dejardin , Olivier; Cancers et préventions<br>Menahem, Benjamin; Centre Hospitalier Universitaire de Caen<br>Chaillot, Fabien; Centre Hospitalier Universitaire de Caen<br>Chene, Yannick; Centre Hospitalier Universitaire de Caen<br>Dutheil, Jean Jacques; Centre Hospitalier Universitaire de Caen<br>Juil, Therese; Aarhus Univ Hosp<br>Morello, Rémy; Centre Hospitalier Universitaire de Caen<br>Alves, Arnaud; Centre Hospitalier Universitaire de Caen |
| <b>Primary Subject Heading</b>: | Surgery                                                                                                                                                                                                                                                                                                                                                                                                                                                                                                                                                                                                |
| Secondary Subject Heading:      | Gastroenterology and hepatology, Surgery                                                                                                                                                                                                                                                                                                                                                                                                                                                                                                                                                               |
| Keywords:                       | bowel dysfunction, rectal cancer, low anterior resection syndrome, colorectal functional outcome, quality of life, validation                                                                                                                                                                                                                                                                                                                                                                                                                                                                          |
|                                 |                                                                                                                                                                                                                                                                                                                                                                                                                                                                                                                                                                                                        |

SCHOLARONE™  
Manuscripts



I, the Submitting Author has the right to grant and does grant on behalf of all authors of the Work (as defined in the below author licence), an exclusive licence and/or a non-exclusive licence for contributions from authors who are: i) UK Crown employees; ii) where BMJ has agreed a CC-BY licence shall apply, and/or iii) in accordance with the terms applicable for US Federal Government officers or employees acting as part of their official duties; on a worldwide, perpetual, irrevocable, royalty-free basis to BMJ Publishing Group Ltd ("BMJ") its licensees and where the relevant Journal is co-owned by BMJ to the co-owners of the Journal, to publish the Work in this journal and any other BMJ products and to exploit all rights, as set out in our [licence](#).

The Submitting Author accepts and understands that any supply made under these terms is made by BMJ to the Submitting Author unless you are acting as an employee on behalf of your employer or a postgraduate student of an affiliated institution which is paying any applicable article publishing charge ("APC") for Open Access articles. Where the Submitting Author wishes to make the Work available on an Open Access basis (and intends to pay the relevant APC), the terms of reuse of such Open Access shall be governed by a Creative Commons licence – details of these licences and which [Creative Commons](#) licence will apply to this Work are set out in our licence referred to above.

Other than as permitted in any relevant BMJ Author's Self Archiving Policies, I confirm this Work has not been accepted for publication elsewhere, is not being considered for publication elsewhere and does not duplicate material already published. I confirm all authors consent to publication of this Work and authorise the granting of this licence.

1  
2  
3 **“The French LARS score”**: Validation of the French version of the low anterior  
4 **resection syndrome (LARS) score for measuring bowel dysfunction after sphincter-**  
5 **preserving surgery among rectal cancer patients: a study protocol**  
6  
7  
8  
9  
10  
11

12 Eid Y <sup>1,2,3</sup>, Bouvier V <sup>2,4</sup>, Dejardin O <sup>2,3</sup>, Menahem B<sup>1</sup>, Chaillot F<sup>3</sup>, Chene Y<sup>3</sup>, Dutheil JJ<sup>3</sup>,  
13  
14 Juul T<sup>5</sup>, Morello R<sup>3,6</sup>, Alves A<sup>1,2,3</sup>

15  
16  
17 <sup>1</sup> Department of digestive surgery, University Hospital of Caen, Avenue de la Côte de Nacre,  
18 14032, Caen, Cedex, France

19  
20 <sup>2</sup> ANTICIPE" U1086 INSERM-University of Caen Normandy, Team « Ligue contre le  
21 Cancer », Centre François Baclesse, Caen, France

22  
23 <sup>3</sup> Department of research, University Hospital of Caen, Normandy, France

24  
25 <sup>4</sup> University Hospital of Caen, Caen cedex, France; Digestive Cancer Registry of Calvados

26  
27 <sup>5</sup> Department of Surgery, Aarhus University Hospital, Aarhus, Denmark

28  
29 <sup>6</sup> Department of biostatistics and clinical research, University Hospital of Caen, 14000 Caen  
30  
31 cedex, France  
32  
33  
34  
35  
36

37 **Corresponding author**

38  
39 Dr Yassine EID – eidyassine@hotmail.fr  
40  
41  
42  
43  
44  
45  
46  
47  
48  
49  
50  
51  
52  
53  
54  
55  
56  
57  
58  
59  
60

## Abstract

**Introduction.** Many bowel problems following low anterior resection (LAR) for rectal cancer considerably impair the quality of life (QoL) of patients. The LAR Syndrome (LARS) scale is a self-report questionnaire to identify and assess bowel dysfunction after rectal cancer surgery. It has been translated and validated in several languages but not in French (metropolitan French). The primary objective is to adapt the LARS scale to the French language (called French-LARS score) and to assess its psychometric properties. Secondary objectives are to assess both the prevalence and severity of LARS and to measure their impact on QoL.

**Method and analysis.** A French multicentre observational cohort study has been designed. The validation study will include translation of the LARS scale following the current international recommendations, assessment of its reliability, convergent and discriminant validities, sensitivity, internal consistency, internal validity, and confirmatory analyses. One thousand patients will be enrolled for the analyses. The questionnaire will be initially administered to the first 100 patients in order to verify the adequacy and degree of comprehension of the questions. Then reproducibility will be investigated by a test-retest procedure in the following 400 patients.

An analysis will be conducted to determine the correlation between the LARS score and the QLQ questionnaires (EORTC's QLQ-C30, QLQ-CR29). Risk factors linked to QoL deterioration will be identified and their impact will be measured. This study will meet the need for a validated tool to improve patient care and QoL.

**Ethics and dissemination.** The institutional review board of the University Hospital of Caen and the ethics committee (CPP Nord Ouest I, January 25, 2019) approved the study. This study is supported by a grant from the French Ministry of Health (PHRC- K17-031). The

1  
2  
3 institutional promoter is the University Hospital of Caen Department of Clinical Research  
4  
5 and Innovation (DCRI).  
6

7  
8 **Trial registration number.** NCT03569488  
9

10 **Strengths and limitations of this study.**  
11

12 - The validation of the French version of the LARS score (the French-LARS score) will allow  
13 the use of a scientific instrument to assess both the prevalence and severity of LARS in  
14 French language.  
15

16  
17 - The French-LARS study is a multicentre cohort study of rectal cancer patients  
18 included from 34 units of colorectal surgery in France.  
19

20  
21 - Limitations include the use of non-probability sampling, which is expected to impose  
22 selection bias.  
23

24 **Word count of the manuscript : 4302 words**  
25

26 **Keywords:** bowel dysfunction, rectal cancer, low anterior resection syndrome, colorectal  
27  
28 functional outcome, quality of life, validation  
29  
30  
31  
32  
33  
34  
35  
36  
37  
38  
39  
40  
41  
42  
43  
44  
45  
46  
47  
48  
49  
50  
51  
52  
53  
54  
55  
56  
57  
58  
59  
60

## Manuscript

### Background

#### *Rectal cancer management*

In recent years, progress in the multimodal treatments of rectal cancer (RC) has improved local disease control and increased the survival rate (up to 50% survival at 5 years) [1, 2]. At the same time, the evolution of surgical techniques and the achievement of a 1-cm distal margin below the tumour have pushed back the limits of sphincter-preserving surgery (SPS) without impairing oncological prognosis [3, 4]. Up to 80% of patients with RC undergo SPS [5]. The assessment of RC outcome has traditionally focused on morbidity rate, tumour recurrence and survival, while functional sequelae (i.e., bowel and/or genitourinary impairment) have long been regarded as inherent to the nature of RC treatments [6, 7]. However, with improved surgical outcomes, we and others have observed a rising number of RC survivors who live with numerous potential side-effects and, eventually, an impaired quality of life (QoL) [6-9]. Therefore, bowel function, like QoL, has become an increasingly important focus of care [10].

#### *Bowel dysfunction following SPS*

It is widely accepted that as many as 50% to 90% of patients who undergo SPS will have a subsequent change in bowel habit [11, 12]. The wide spectrum of bowel symptoms after resection with SPS has been termed the "low anterior resection syndrome (LARS)". The prevalence and severity of LARS remain difficult to assess. Several authors still consider faecal incontinence to be the foremost intestinal sequela, underscoring the impact of urgency and impaired evacuation.

LARS is defined as follows: frequent bowel movements (increased number of stools during the day and/or night); clustering (repeated passage of several stools over a few hours, sometimes requiring the patient to defecate four or five times in 1–2 h); disorders of

1  
2  
3 continence from minimal gas leaks or staining to debilitating faecal incontinence and faecal  
4  
5 urgency; and urgency (inability to prevent defecation for > 15 min when the need arises) [11,  
6  
7 12]. These symptoms usually appear immediately after surgery, become most pronounced  
8  
9 during the first few months, improve somewhat thereafter, and reach a steady state after  
10  
11 approximately one to two years [11, 12]. Recently, a pragmatic definition of LARS has been  
12  
13 proposed: "disordered bowel function after rectal resection, leading to a detriment in QOL"  
14  
15 [13].  
16  
17  
18  
19  
20  
21

### 22 ***Rationale for using the LARS score***

23  
24 Although many questionnaires or instruments have been used to assess the impact of LARS  
25  
26 on QoL, a recent systematic review and meta-analysis observed that 65% of the studies  
27  
28 included did not use a validated assessment instrument [14]. Furthermore, there is a wide  
29  
30 range of assessment tools, including single examinations and different scoring systems, such  
31  
32 as the Memorial Sloan Kettering Cancer Center (MSKCC) score, the bowel function  
33  
34 instrument (BFI), and the Wexner, St. Marks and FSFI scores. Most of the instruments used  
35  
36 to assess bowel function measure faecal incontinence but leave aside other symptoms that  
37  
38 have been shown to have a more significant correlation with QoL, such as clustering and  
39  
40 urgency [15]. Since 2012, a group of Danish authors has developed and validated a 5-item  
41  
42 instrument for the evaluation of LARS: the LARS score [16]. The items are incontinence for  
43  
44 flatus or for liquid stool, frequency of bowel movements, clustering of stools, and urgency. It  
45  
46 allows the categorization of patients into three groups: no LARS (0-20 points), minor LARS  
47  
48 (21-29 points), and major LARS (30-42 points) [16]. To date, it is the best questionnaire for  
49  
50 capturing anorectal postoperative function. When faecal incontinence is the major concern,  
51  
52 the Wexner, St. Marks or FSFI scores are adequate, the latter being the most sound from a  
53  
54 methodological viewpoint. While the MSKCC-FBI is the best questionnaire for evaluating  
55  
56  
57  
58  
59  
60

1  
2  
3 LARS, its use is complex. For this reason, the LARS score is currently used preferentially for  
4 first-line evaluation [15]. Its ability to reflect the impact of bowel dysfunction on QoL was  
5 proven in its initial validation and subsequently through its association with the EORTC  
6 QLQ-C30 scale [17]. In clinical settings, its severity categories (No LARS, Minor LARS, and  
7 Major LARS) can facilitate rapid identification of patients most in need of treatment. Patients  
8 with major LARS reported seriously compromised QoL and significantly worse QoL  
9 compared with those with No/Minor LARS. Consequently, half of the patients restricted their  
10 diet and limited their social activity [17]. In addition to the original Danish version, the  
11 LARS score has been translated into English, Dutch, Swedish, Spanish, German and Chinese,  
12 and can potentially be used widely[18-20].  
13  
14  
15  
16  
17  
18  
19  
20  
21  
22  
23  
24  
25  
26  
27  
28

### 29 *Hypothesis and objectives of the investigations*

30 Both the adoption of a uniform definition of LARS and the consistent use of the same  
31 questionnaire allow researchers to pool and compare the results of different studies and  
32 institutions. . However, a validated French version of the LARS score is not yet available.  
33 The main objective therefore will be to adapt and validate the LARS scale questionnaire to  
34 the French language (called French-LARS score) and assess its psychometric properties.  
35 Secondary objectives are to assess both the prevalence and severity of LARS and to measure  
36 their impact on QoL.  
37  
38  
39  
40  
41  
42  
43  
44  
45  
46  
47  
48

### 49 **Methods**

#### 50 51 52 53 *Study design*

54 The French-LARS study is an observational, multicentre, cohort study of rectal cancer  
55 patients who have undergone curative sphincter-preserving surgery with partial or total  
56  
57  
58  
59  
60



mesorectal excision. Patients are included from 34 units of colorectal surgery in France (see list of participating centres in the Acknowledgements section). The study has been approved by the scientific board of the French Research Group of Rectal Cancer Surgery (GRECCAR). This group was created by surgical teams in France who are involved in the management of rectal cancer, with the aim of conducting and publishing multicentre clinical trials on the subject in high-level journals and expanding this surgical specialty to various learned societies. Most of the participating teams in the study are affiliated with the GRECCAR. All investigators will proceed with this study in accordance with the Declaration of Helsinki.

### ***Study population***

All patients will provide written informed consent prior to their enrolment for study participation.

The inclusion criteria are as follows: aged between 18 and 80 years; rectal cancer patients who have undergone curative sphincter-preserving surgery with partial or total mesorectal excision; surgery performed between January 2007 and January 2017, with reversal of the defunctioning stoma before January 2017; bowel continuity restored for at least 24 months (including the reversal of the temporary stoma); voluntary participation in the study. The exclusion criteria are as follows: a palliative rectal cancer resection; presence of stoma; known disseminated or recurrent disease; cognition and/or language issues.

For patients lost to follow-up, an active search will be carried out with general practitioners and, if necessary, with the birth councils in order to know the vital status. Participants in the validation study will be identified through local databases by the investigators at each of the participating centres. They will be selected randomly from the pool of eligible subjects.

Participants will be approached not earlier than 24 months after surgery to allow their bowel function to have regained stability [11, 12, 17].

### ***Data collected***

Demographic and clinical information will be obtained from the databases. Patient characteristics will be collected on e-CRFs (electronic Case Report Forms) and include age, sex, body mass index, tumour height (distance from anal verge on MRI or rigid sigmoidoscopy in centimetres), timing and type of neoadjuvant radiotherapy and chemotherapy, if recommended; time since surgery; type of surgery (PME or TME); type of anastomosis; defunctioning stoma; and postoperative mortality and morbidity such as pelvic abscess, anastomotic leakage, and reoperation. Morbidity will be evaluated with the new classification of surgical complications by Dindo et al. [21], which includes five grades. The usual data will be recorded: distal and circumferential margins, the number of resected and invaded nodes, tumoral differentiation, the presence of vascular emboli (venous or lymphatic, intra- or extra-mural), perineural invasion, and the quality of the mesorectal excision. The resected specimen will be staged according to American Joint Committee on Cancer (AJCC) criteria (7th version).

Data collection will be performed according to the following procedures. (i) The researchers will identify eligible participants by reviewing the medical records of rectal cancer patients. (ii) Eligible patients will be contacted by postal invitation and will be informed about the purpose of the study. (iii) The completed questionnaires will be carefully checked by the researchers for any missing information. Eligible patients will be contacted by postal invitation twice if they do not reply. Any unclear item of missing information will be reconfirmed through a phone call. If this is not possible, the questionnaire will be considered invalid.

### ***Study endpoints***

1  
2  
3 The primary objective is to validate a French-language version of the LARS score, to adapt  
4 the LARS scale questionnaire to the French language (called French-LARS score) and to  
5 assess its psychometric properties and factor structure. The secondary objectives are to assess  
6 both the prevalence and severity of LARS and to measure their impact on QoL.  
7  
8  
9  
10  
11  
12  
13

### 14 ***Detailed description of implemented techniques***

15  
16  
17 The validation study of the French version of the LARS score is based on face and content  
18 validity as well as on the measurement of its psychometric properties, in compliance with the  
19 standards published by the American Educational Research Association et al. [22].  
20  
21  
22  
23  
24  
25

### 26 ***Validation study of French version***

27  
28 The different steps are detailed in figure 1 and figure 2.  
29

### 30 ***Translation process***

31  
32  
33 After obtaining permission from the original authors [18, 19], we will conduct the forward-  
34 and back-translation procedures in accordance with the translation guidelines provided by the  
35 authors. The French-LARS questionnaire will be developed by translating the questions into  
36 French, a task that will be performed by two independent translators who are native French  
37 speakers with a high level of fluency. The two translators will check and discuss the two  
38 translations only for inconsistency and will establish a single preliminary French version.  
39  
40 Thereafter, the French version will be back-translated into English by two independent  
41 professional translators; both are fluent in French and with English as their mother tongue,  
42 and both are unfamiliar with the background objectives of the study. Both versions of the  
43 backward translation will be compared with each other and with the initial version. After  
44 minor adjustments, a final French version will be agreed upon. The final French version and  
45  
46  
47  
48  
49  
50  
51  
52  
53  
54  
55  
56  
57  
58  
59  
60

1  
2  
3 the whole translation process mentioned above will be sent to the original authors for  
4  
5 approval.  
6  
7  
8  
9

### 10 ***Content validity***

11  
12 Content validity will be assessed by a panel of experts during the process, which will lead to  
13  
14 the final French version of the scale. Using a 3-point Likert scale (poor, average and good),  
15  
16 each expert will judge independently whether the content from the original LARS score is  
17  
18 conserved and adapted in the French language (see Acknowledgements).  
19  
20  
21  
22

### 23 ***Face validity and perceived validity***

24  
25 Then, a pilot study will be conducted. The French LARS score will be administered to 100  
26  
27 patients in order to verify the adequacy and degree of comprehension of the questions (figure  
28  
29 1). These patients will be chosen according to their representativeness based on a wide range  
30  
31 of socio-demographic and clinical characteristics. Both male and female patients will  
32  
33 complete the questionnaire. They will have primary education levels, secondary education  
34  
35 levels, and college or higher education levels and tumour stages I, II and III.  
36  
37  
38

39  
40 Each patient using the French-LARS score will be asked to review the questionnaire by  
41  
42 precisely pointing out all the difficulties encountered when using the instrument, including  
43  
44 the following: items that are ambiguous or poorly formulated; difficulties or confusion  
45  
46 completing the scale. They will then be asked to indicate whether the questionnaire is  
47  
48 acceptable and easy to understand.  
49  
50  
51  
52

### 53 ***Reliability***

54  
55 Reproducibility will be investigated by a test-retest procedure. A randomly selected subgroup  
56  
57 of participants (n= 400) will be sent the French-LARS score questionnaire twice (figure 1).  
58  
59  
60

1  
2  
3 The second test will be sent to the participants one or two weeks after completion of the first  
4 test. Patients will be asked if they have experienced any significant change in bowel function  
5 between the first and the second test. Those confirming a change in bowel function will be  
6 excluded from the test-retest analysis. Non-responders will be further contacted twice, either  
7 via postal invitation or by phone. The test-retest study will be performed by comparing the  
8 French-LARS scores obtained at the two time points. The test-retest reliability of the  
9 questionnaire will be assessed by Cohen's Kappa coefficient (no LARS, minor LARS and  
10 major LARS scores) or by intra-class correlation coefficient, ICC (quantitative LARS score).  
11 Internal consistency will be estimated by the Cronbach alpha coefficient.  
12  
13  
14  
15  
16  
17  
18  
19  
20  
21  
22  
23  
24  
25

### 26 ***Convergent validity***

27  
28 Convergent validity will be determined by computing the correlations between the French-  
29 LARS score and the EORTC QLQ-C30 and QLQ-CR29 domains [23], which have been  
30 globally accepted and widely used as valid instruments for measuring QoL. Thus, eligible  
31 patients will receive a postal invitation to complete the EORTC QLQ-C30 and QLQ-CR29  
32 along with the French-LARS scores. Furthermore, to study the convergent validity between  
33 qualitative measures of the LARS scores (no LARS, minor LARS and major LARS) and  
34 QoL, the patients will be asked a general question [16, 19]: "Overall, how much does your  
35 bowel function affect your quality of life?" Four mutually exclusive responses, "not at all",  
36 "very little", "somewhat" or "a lot", will be proposed.  
37  
38  
39  
40  
41  
42  
43  
44  
45  
46  
47  
48  
49  
50

### 51 ***Discriminant validity***

52  
53 Regarding the scoring instructions for these two instruments, a high score represents a high  
54 QoL or a high level of functioning for the global QoL subscale and functional subscale.  
55  
56 However, for a symptom subscale/item, the higher the score, the more severe the symptom.  
57  
58  
59  
60

1  
2  
3 The ability to discriminate between patients with different clinical characteristics is necessary  
4  
5 for an instrument to be considered valid. To test the tool's discriminant validity, we will use  
6  
7 known variables, including gender, age, neoadjuvant radiation therapy, distance of the  
8  
9 tumour from the anal verge, the extent of mesorectal excision (partial versus total), prior  
10  
11 temporary stoma, length of postoperative period (time since stoma-free rectal resection  
12  
13 surgery or reversal surgery from temporary stoma) and postoperative septic complications  
14  
15 such as pelvic abscess or anastomotic leakage. These variables are known to affect bowel  
16  
17 function after SPS in rectal cancer patients [11-13, 24]. The following numerical variables  
18  
19 will be changed into binary variables: age, distance of the tumour from the anal verge, and  
20  
21 length of the postoperative period. The median value for each will serve as the cut-off point.  
22  
23 Neoadjuvant radiation therapy, the extent of mesorectal excision (partial versus total), and  
24  
25 prior temporary stoma will be treated as dichotomous variables: no treatment at all versus  
26  
27 treatment. Moreover, interactions with neoadjuvant radiation therapy will be systematically  
28  
29 tested. The EORTC will provide us with and authorize our use of the French version of the  
30  
31 two questionnaires.  
32  
33  
34  
35  
36  
37  
38  
39

#### 40 ***Sensitivity of the items***

41  
42 A systematic search for ceiling or floor effects will be performed.  
43  
44  
45  
46

#### 47 ***Internal consistency***

48  
49 Internal consistency will be assessed using Cronbach's alpha coefficient.  
50  
51  
52

#### 53 ***Internal validity***

54  
55 A factorial analysis will allow verification of the internal structure of the scale. The statistical  
56  
57 method used is described below.  
58  
59  
60

### ***Confirmatory analysis***

A confirmatory analysis will be conducted to evaluate the recognized structural validity of the scale with regard to its first edition.

### ***Statistical analysis***

Quantitative variables will be expressed as the mean  $\pm$  standard deviation (SD), and qualitative variables will be expressed as the number of patients and percentages. The experimental design of the study leads to the same patient being seen several times during their oncology follow-up. However, apart from the subgroup of patients who participate in the study of repeatability, each patient will complete only one questionnaire in the study. Comparisons between the mean scores of the three groups (no LARS, minor LARS or major LARS) will be carried out with the help of an ANOVA or a Kruskal-Wallis test, depending on whether the data follow the verified homoscedasticity hypothesis or not. Post hoc comparisons will be performed with the Bonferroni correction or the Nemenyi test. Factor analysis will be performed with a principal component analysis. The selected factors will correspond to an eigenvalue  $\geq 1$ . The repeatability test (test-retest), in which 400 patients will be asked to complete the F-LARSF-LARSF-LARS twice within 15 days, will be Student's *t*-test for repeated measurements, with the help of the intraclass correlation coefficient (ICC) and its 95% CI, will use ANOVA for random effects models. After estimating the various components of the total variance, the ICC will be calculated in the usual manner. A Bland and Altman plot will be used to show the level of agreement of the repeatability test.

1  
2  
3 The sensitivity and specificity of the French-LARS score in predicting the impact on QoL  
4 will be assessed by receiver operating characteristic (ROC) curves of the score versus groups  
5 reporting no/minor or some/major impact on QoL.  
6  
7

8  
9  
10 The correlation between the LARS validated score and the QLQ questionnaires (EORTC's  
11 QLQ-C30, QLQ-CR29) will be estimated with the Pearson correlation coefficient as well as  
12 with the Spearman correlation coefficient and its 95% CI.  
13  
14

15  
16  
17 The inclusion of the data indicating the impact of LARS on QoL will be based on a univariate  
18 approach and then a multivariate approach using ad hoc models according to the nature of the  
19 dependent variable (binary or multinomial logistic regression or linear regression depending  
20 on whether the QoL score is considered qualitative or quantitative). Only variables whose  
21 level of significance in the univariate analysis is  $p < 0.15$  will be included in the multivariate  
22 model. This approach will enable the identification of the risk factors linked to a deterioration  
23 in QoL and an evaluation of their impact.  
24  
25

26  
27  
28 Confirmatory analysis will use structural equation models that enable the validation of the  
29 measurement structure of various concepts.  
30  
31

32  
33 All the tests will be two-sided with a level of significance ( $p$ ) that equals 0.05. IBM®-SPSS®  
34 22.0 and AMOS for Windows® software will be used.  
35  
36

### 37 38 39 40 41 42 ***Patient and public involvement***

43  
44 Patients were not involved in the design, the recruitment and conduct of the study. The  
45 results will be disseminated to study participants by email/paper by the physicians who  
46 included them in the study.  
47  
48  
49

### 50 51 52 53 ***Feasibility***

54  
55 Thirty-four colorectal cancer centres, including both university hospitals and cancer control  
56 centres, have given their consent to include between 50 and 100 patients who underwent SPS  
57  
58  
59  
60



1  
2  
3 from 2007 to 2017 (see the list of participating centres in the Acknowledgements section).  
4  
5 The availability of patients for study inclusion from each GRECCAR centre has been  
6  
7 demonstrated in published randomized studies (25-28). We chose to include patients who  
8  
9 underwent SPS between 2007 and 2017 for two reasons. First, the French recommendations  
10  
11 for clinical practice and therapeutic choices for rectal cancer were published after 2007,  
12  
13 which make the diagnoses and therapeutic strategies homogeneous [10]. Second, participants  
14  
15 were approached a minimum of 24 months after surgery to allow their bowel function to have  
16  
17 regained stability [11, 18, 19]. Finally, eligible participants are usually monitored in each  
18  
19 centre at regular intervals to screen for local recurrence and/or distant metastasis. For all  
20  
21 these reasons, approximately 3000 patients will be contacted in order to include more than  
22  
23 1000 patients, expecting a 33% response rate.  
24  
25  
26  
27  
28  
29

### 30 ***Registration***

31  
32 The data will be collected and registered in e-CRFs by a dedicated local technical research  
33  
34 team using the Ennov Clinical software.  
35  
36  
37  
38  
39

### 40 ***Study organization***

41  
42 The lead partner will be the University Hospital of Caen, France. The study will receive  
43  
44 financial support from the Program for Hospital Clinical Cancer Research “**INCa-**  
45  
46 **DGOS\_12112**”.  
47  
48  
49  
50

### 51 ***Duration and timeline***

52  
53 Patients will be included for 12 months. The approval protocol from the ethical committee,  
54  
55 financial support, and e-CRFs were developed in 2018 and 2019. Recruitment of the patients  
56  
57 is planned to continue until the first semester of 2021. The database will be closed in 2021,  
58  
59  
60

1  
2  
3 after which data analysis, manuscript writing, and submission for publication will follow  
4  
5 (figure 2).  
6  
7  
8  
9

### 10 ***Ethics***

11  
12 The institutional review board of the University Hospital of Caen and the ethics committee  
13  
14 (CPP Nord Ouest I, January 25, 2019) approved the study. The French-LARS study was  
15  
16 registered on January 28, 2019, on the ClinicalTrials.gov Web site with trial identification  
17  
18 number NCT03569488. This study is supported by a grant from the French Ministry of  
19  
20 Health (PHRC- K17-031). The institutional promoter is the University Hospital of Caen  
21  
22 Department of Clinical Research and Innovation (DCRI).  
23  
24  
25  
26  
27

### 28 **Discussion**

29  
30 Although the prevalence and severity of LARS remain difficult to assess, the LARS score,  
31  
32 which has been developed and validated for seven years, represents the best questionnaire to  
33  
34 capture anorectal postoperative function to date [15]. However, a validated French version of  
35  
36 the LARS score is not yet available. This French-LARS score will allow for the development  
37  
38 of future research and clinical practice in France. LARS remains a major problem, but it is  
39  
40 not well understood among healthcare professionals, and it is frequently underestimated.  
41  
42 Furthermore, there is considerable discrepancy between the clinician's judgement of patient  
43  
44 perception and the patient's actual view or experience [25, 26]. For example, specialists tend  
45  
46 to overestimate the impact of incontinence and frequent bowel movements, while they  
47  
48 underestimate the impact or urgency and clustering [25]. Therefore, knowledge of therapeutic  
49  
50 options such as transanal irrigation, biofeedback, or sacral nerve stimulation for patients with  
51  
52 LARS is limited [27-29]. These recent studies have indicated that there is a need for  
53  
54 improved LARS education for clinicians [25, 26]. There is now evidence that both the  
55  
56  
57  
58  
59  
60

1  
2  
3 distribution of patients within different LARS groups (minor and/or major) and the impact of  
4 LARS on QoL do not change over time [30]. According to recent studies [31], nearly 50% of  
5 patients still experience major LARS 13 to 15 years after surgery. Interestingly, only major  
6 LARS has an impact on patients' QoL [32].  
7  
8  
9

10  
11  
12 A 2019 survey highlights the notable functional consequences reported by RC survivors after  
13 SPS surgery [33]. Based on validated instruments, 40% of RC survivors suffer from a major  
14 LARS episode that significantly impairs their QoL. More interestingly, bowel dysfunction  
15 was the only predictor of QoL for such patients after adjustment for age and various QoL  
16 components (urinary and sexual function) [33].  
17  
18  
19

20  
21  
22 Clinicians will be able to use the validated French LARS score in daily clinical practice not  
23 only to identify patients with elevated LARS scores but also to predict bowel dysfunction for  
24 prevention and rapid management. It will hopefully lead to improved clinician awareness in  
25 order to improve both the prevention and treatment of bowel dysfunction and the information  
26 given to patients. In the future, we will be able to develop a new patient-led follow-up  
27 programme based on symptom burden and health-related QoL. To this end, a recently  
28 published nomogram, "the POLARS score", has been developed to predict bowel dysfunction  
29 severity prior to anterior resection [34]. Theoretically, it allows clinicians to personalize care  
30 during multidisciplinary team meetings, to prepare patients for the consequences of  
31 treatment, and to guide the treatment decision with patient consent. An alternative strategy  
32 for high-risk patients, called the "watch-and-wait" policy, has been proposed in cases of  
33 complete clinical response following chemo-radiation therapy. Although it leads to fewer  
34 functional problems than rectal resection, major LARS symptoms have been reported in up to  
35 one-third of these patients [35]. However, there is, to date, insufficient evidence to draw firm  
36 conclusions about the oncological safety of this approach.  
37  
38  
39  
40  
41  
42  
43  
44  
45  
46  
47  
48  
49  
50  
51  
52  
53  
54  
55  
56  
57  
58  
59  
60

1  
2  
3 In summary, the validation of the French-LARS score will allow the use of a scientific  
4 instrument to assess both the prevalence and severity of LARS. Together with oncological  
5 data, it will also form a basis on which to discuss functional outcomes with patients.  
6  
7  
8  
9  
10  
11  
12  
13  
14  
15  
16  
17  
18  
19  
20  
21  
22  
23  
24  
25  
26  
27  
28  
29  
30  
31  
32  
33  
34  
35  
36  
37  
38  
39  
40  
41  
42  
43  
44  
45  
46  
47  
48  
49  
50  
51  
52  
53  
54  
55  
56  
57  
58  
59  
60

For peer review only

### List of abbreviations

C30: Core 30

CR 29: Colo Rectal 29

CRF: Case Report Form

DCRI: Department of Clinical Research and Innovation

eCRF: electronic Case Report Form

EORTC: European Organization for Treatment and Research of Cancer

FSFI: Female Sexual Function Index

ICC: Intraclass Correlation Coefficient

QLQ: Quality of Life Questionnaire

LARS: Low Anterior Resection Syndrome

MSKCC: Memorial Sloan Kettering Cancer Center

PME: Partial Mesorectal Excision

POLARS: Pre-Operative Low Anterior Resection Syndrome

QoL: Quality of Life

RC: Rectal Cancer

SD: Standard Deviation

SPS: Sphincter-preserving surgery

TME: Total Mesorectal Excision

### *Acknowledgements*

The authors thank Cathy Gaillard from the Clinical Research Unit of Caen University Hospital for her practical help with the study.

The authors also thank the following clinicians from the participating centres: Pr BERDAH Stéphane, Dr BEYER-BERJOT Laura, Hôpital Nord, Marseille. Pr PANIS Yves, Dr MAGGIORI Leon, CHU Beaujon, Clichy. Dr DUMONT Frédéric, Institut de Cancérologie de l'Ouest, Nantes. Dr DUBOIS Anne, CHU Estaing, Clermont-Ferrand. Pr RULLIER Eric, Dr DENOST Quentin, CHU Bordeaux Hôpital Saint André. Pr TUECH Jean-Jacques, Dr BRIDOUX Valérie, CHU de Rouen. Pr KAROUI Mehdi, Dr MANCEAU Gilles, CHU Pitié-Salpêtrière, Paris. Pr PIESSEN Guillaume, CHU Lille. Pr COTTE Eddy, CHU Lyon Sud. Dr JAFARI Merdhad, Centre Oscar Lambret, Lille. Dr DENET Christine, Institut Mutualiste Montsouris, Paris. Dr POL Bernard, Hôpital Saint Joseph, Marseille. Dr CHOULLARD Elie, CH Poissy et Saint-Germain-en-Laye. Pr BENOIST Stéphane, Pr BROUQUET Antoine, CHU de Bicêtre. Pr PARC Yann, Pr LEFEVRE Jérémie, Hôpital Saint-Antoine. Pr FAUCHERON Jean-Luc, CHU de Grenoble. Pr ROUANET Philippe, Institut Régional du Cancer, Montpellier. Dr LORIAU Jérôme, CH Saint-Joseph, Paris. Pr POCARD Marc, Dr EVENO Clarisse, Hôpital Lariboisière, Paris. Dr DESOLNEUX Grégoire Institut Bergonié, Bordeaux. Dr LAKKIS Zaher, CHU de Besançon. Pr PRUDHOMME Michel, CHU de Nîmes. Pr REGIMBEAU Jean Marc, Pr SABBAGH Charles, CHU d'Amiens. Pr OUAISSI Mehdi, CHU de Tours. Pr SIELEZNEFF Igor, Dr MEGE Diane, CHU Timone, Marseille. Dr BADIC Bogdan, CHU de Brest. Pr BRESLER Laurent, Pr, CHU Brabois Nancy. Dr BENHAIM Leonor, Institut Gustave Roussy, Villejuif. Pr MEUNIER Bernard, CHU Rennes. Pr ROHR Serge, Dr ROMAIN Benoît, CHU Hautepierre Strasbourg. Dr MARCHAL Frédéric. Institut de cancérologie de Lorraine, Nancy. Dr LELONG Bernard, Dr de

1  
2  
3 CHAISEMARTIN Cécile, Institut Paoli Calmette, Marseille. Pr BERGER Anne, Hôpital  
4 Georges POMPIDOU, Paris. Dr d'ANGELIS Nicolas, Hôpital Henri Mondor, Créteil.

5  
6 We would like to thank Frederic Bretagnol, Laurent Siproudhis, François Pigot, and Amelie  
7  
8 Anota for their help in producing the final French version of the scale.  
9  
10  
11  
12  
13

### 14 ***Contributors***

15  
16 Study conception and design: AA, VB, RM, YE. Intervention design: RM, AA, VB, YE, JJD,  
17  
18 FC, YC, JJD, BM and YE. Analysis of data will be done by YE, OD and RM.  
19

20  
21 AA drafted the work, which was revised critically for intellectual content by TJ. All authors  
22  
23 gave final approval of this version to be published.  
24  
25

### 26 ***Funding***

27  
28 The study received financial support from the Program for Hospital Clinical Cancer Research  
29  
30 “INCa-DGOS\_12112”.  
31  
32

### 33 ***Competing interests***

34  
35 None declared.  
36  
37  
38  
39  
40  
41  
42  
43  
44  
45  
46  
47  
48  
49  
50  
51  
52  
53  
54  
55  
56  
57  
58  
59  
60

## References

1. Ferlay J, Steliarova-Foucher E, Lortet-Tieulent J, Rosso S, Coebergh JW, Comber H, et al. Cancer incidence and mortality patterns in Europe: estimates for 40 countries in 2012. *Eur J Cancer*. 2013;49:1374-403.
2. Siegel RL, Miller KD, Fedewa SA, Ahnen DJ, Meester RGS, Barzi A, et al. Colorectal cancer statistics, 2017. *CA Cancer J Clin*. 2017;67:177-93.
3. Lakkis Z, Manceau G, Bridoux V, Brouquet A, Kirzin S, Maggiori L, et al. Management of rectal cancer: the 2016 French guidelines. *Colorectal Dis*. 2017;19:115-22.
4. Rullier E, Laurent C, Bretagnol F, Rullier A, Vendrely V, Zerbib F. Sphincter-saving resection for all rectal carcinomas: the end of the 2-cm distal rule. *Ann Surg*. 2005;241:465-9.
5. Chau A, Maggiori L, Debove C, Kanso F, Hennequin C, Panis Y. Toward the end of abdominoperineal resection for rectal cancer? An 8-year experience in 189 consecutive patients with low rectal cancer. *Ann Surg*. 2014;260:801-5; discussion 805-6.
6. Sarcher T, Dupont B, Alves A, Menahem B. Anterior resection syndrome: what should we tell practitioners and patients in 2018? *J Visc Surg*. 2018;155:383-91.
7. Abdelli A, Tillou X, Alves A, Menahem B. Genito-urinary sequelae after carcinological rectal resection: what to tell patients in 2017. *J Visc Surg*. 2017;154:93-104.
8. Wiltink LM, Marijnen CA, Kranenbarg EMK, van de Velde CJ, Nout RA. A comprehensive longitudinal overview of health-related quality of life and symptoms after treatment for rectal cancer in the TME trial. *Acta Oncol*. 2016;55:502-8.



- 1  
2  
3 9. Krouse RS, Wendel CS, Garcia DO, Grant M, Temple LKF, Going SB, et al. Physical  
4 activity, bowel function, and quality of life among rectal cancer survivors. *Qual Life*  
5  
6  
7  
8  
9  
10  
11 10. Alves A. Recommendations for clinical practice. Therapeutic choices for rectal  
12 cancer. How can we reduce therapeutic sequelae and preserve quality of life?  
13  
14  
15  
16  
17 11. Bryant CL, Lunniss PJ, Knowles CH, Thaha MA, Chan CL. Anterior resection  
18 syndrome. *Lancet Oncol*. 2012;13:e403-8.  
19  
20  
21 12. Ziv Y, Zbar A, Bar-Shavit Y, Igov I. Low anterior resection syndrome (LARS): cause  
22 and effect and reconstructive considerations. *Tech Coloproctol*. 2013;17:151-62.  
23  
24  
25  
26 13. Keane C, Wells C, O'Grady G, Bissett IP. Defining low anterior resection syndrome:  
27 a systematic review of the literature. *Colorectal Dis*. 2017;19:713-22.  
28  
29  
30  
31 14. Scheer AS, Boushey RP, Liang S, Doucette S, O'Connor AM, Moher D. The long-  
32 term gastrointestinal functional outcomes following curative anterior resection in  
33 adults with rectal cancer: a systematic review and meta-analysis. *Dis Colon Rectum*.  
34  
35  
36  
37  
38  
39  
40 15. Chen TY, Emmertsen KJ, Laurberg S. What are the best questionnaires to capture  
41 anorectal function after surgery in rectal cancer? *Curr Colorectal Cancer Rep*.  
42  
43  
44  
45  
46  
47 16. Emmertsen KJ, Laurberg S. Low anterior resection syndrome score: development and  
48 validation of a symptom-based scoring system for bowel dysfunction after low  
49 anterior resection for rectal cancer. *Ann Surg*. 2012;255:922-8.  
50  
51  
52  
53  
54 17. Emmertsen KJ, Laurberg S, Rectal Cancer Function Study Group. Impact of bowel  
55 dysfunction on quality of life after sphincter-preserving resection for rectal cancer. *Br*  
56  
57  
58  
59  
60  
60

- 1  
2  
3 18. Juul T, Ahlberg M, Biondo S, Emmertsen KJ, Espin E, Jimenez LM, et al.  
4  
5 International validation of the low anterior resection syndrome score. *Ann Surg.*  
6  
7 2014;259:728-34.  
8  
9
- 10 19. Juul T, Battersby NJ, Christensen P, Janjua AZ, Branagan G, Laurberg S, et al.  
11  
12 Validation of the English translation of the low anterior resection syndrome score.  
13  
14 *Colorectal Dis.* 2015;17:908-16.  
15  
16
- 17 20. Hou XT, Pang D, Lu Q, Yang P, Jin SL, Zhou YJ, et al. Validation of the Chinese  
18  
19 version of the low anterior resection syndrome score for measuring bowel dysfunction  
20  
21 after sphincter-preserving surgery among rectal cancer patients. *Eur J Oncol Nurs.*  
22  
23 2015;19:495-501.  
24  
25
- 26 21. Dindo D, Demartines N, Clavien PA. Classification of surgical complications: a new  
27  
28 proposal with evaluation in a cohort of 6336 patients and results of a survey. *Ann*  
29  
30 *Surg.* 2004;240:205-13.  
31  
32
- 33 22. American Educational Research Association, American Psychological Association,  
34  
35 National Council on Measurement in Education, Joint Committee on Standards for  
36  
37 Educational & Psychological Testing (US). *Standards for educational and*  
38  
39 *psychological testing.* Washington, DC: American Educational Research Association;  
40  
41 2014.  
42  
43
- 44 23. Wong CK, Chen J, Yu CL, Sham M, Lam CL. Systematic review recommends the  
45  
46 European organization for research and treatment of cancer colorectal cancer-specific  
47  
48 module for measuring quality of life in colorectal cancer patients. *J Clin Epidemiol.*  
49  
50 2015;68:266-78.  
51  
52
- 53 24. Hain E, Manceau G, Maggiori L, Mongin C, Prost ALDJ, Panis Y. Bowel dysfunction  
54  
55 after anastomotic leakage in laparoscopic sphincter-saving operative intervention for  
56  
57  
58  
59  
60

- 1  
2  
3 rectal cancer: a case-matched study in 46 patients using the low anterior resection  
4 score. *Surgery*. 2017;161:1028-39.  
5  
6  
7  
8 25. Chen TY, Emmertsen KJ, Laurberg S. Bowel dysfunction after rectal cancer  
9 treatment: a study comparing the specialist's versus patient's perspective. *BMJ Open*.  
10 2014;4:e003374.  
11  
12  
13  
14 26. Jimenez-Gomez LM, Espin-Basany E, Marti-Gallostra M, Sanchez-Garcia JL,  
15 Vallribera-Valls F, Armengol-Carrasco M. Low anterior resection syndrome: a survey  
16 of the members of the American Society of Colon and Rectal Surgeons (ASCRS), the  
17 Spanish Association of Surgeons (AEC), and the Spanish Society of Coloproctology  
18 (AECP). *Int J Colorectal Dis*. 2016;31:813-23.  
19  
20  
21  
22  
23  
24  
25  
26 27. Maris A, Devreese AM, D'Hoore A, Penninckx F, Staes F. Treatment options to  
27 improve anorectal function following rectal resection: a systematic review. *Colorectal*  
28 *Dis*. 2013;15:e67-78.  
29  
30  
31  
32  
33 28. Visser WS, Te Riele WW, Boerma D, van Ramshorst B, van Westreenen HL. Pelvic  
34 floor rehabilitation to improve functional outcome after a low anterior resection: a  
35 systematic review. *Ann Coloproctol*. 2014;30:109-14.  
36  
37  
38  
39  
40 29. Ramage L, Qiu S, Kontovounisios C, Tekkis P, Rasheed S, Tan E. A systematic  
41 review of sacral nerve stimulation for low anterior resection syndrome. *Colorectal*  
42 *Dis*. 2015;17:762-71.  
43  
44  
45  
46  
47 30. Pieniowski EHA, Palmer GJ, Juul T, Lagergren P, Johar A, Emmertsen KJ, et al. Low  
48 anterior resection syndrome and quality of life after sphincter-sparing rectal cancer  
49 surgery: a long-term longitudinal follow-up. *Dis Colon Rectum*. 2019;62:14-20.  
50  
51  
52  
53  
54 31. Chen TY, Wiltink LM, Nout RA, Kranenbarg EMK, Laurberg S, Marijnen CA, et al.  
55 Bowel function 14 years after preoperative short-course radiotherapy and total  
56  
57  
58  
59  
60

- 1  
2  
3 mesorectal excision for rectal cancer: report of a multicenter randomized trial. Clin  
4  
5 Colorectal Cancer. 2015;14:106-14.  
6  
7  
8 32. Juul T, Ahlberg M, Biondo S, Espin E, Jimenez LM, Matzel KE, et al. Low anterior  
9  
10 resection syndrome and quality of life: an international multicenter study. Dis Colon  
11  
12 Rectum. 2014;57:585-91.  
13  
14  
15 33. Eid Y, Bouvier V, Menahem B, Thobie A, Dolet N, Finochi M, et al. Digestive and  
16  
17 genitourinary sequelae in rectal cancer survivors and their impact on health-related  
18  
19 quality of life: outcome of a high-resolution population-based study. Surgery. 2019;.  
20  
21 doi:10.1016/j.surg.2019.04.007.  
22  
23  
24 34. Battersby NJ, Bouliotis G, Emmertsen KJ, Juul T, Glynne-Jones R, Branagan G, et al.  
25  
26 Development and external validation of a nomogram and online tool to predict bowel  
27  
28 dysfunction following restorative rectal cancer resection: the POLARS score. Gut.  
29  
30 2018;67:688-96.  
31  
32  
33 35. Hupkens BJP, Martens MH, Stoot JH, Berbee M, Melenhorst J, Beets-Tan RG, et al.  
34  
35 Quality of life in rectal cancer patients after chemoradiation: watch-and-wait policy  
36  
37 versus standard resection - a matched-controlled study. Dis Colon Rectum.  
38  
39 2017;60:1032-40.  
40  
41  
42  
43  
44  
45  
46  
47  
48  
49  
50  
51  
52  
53  
54  
55  
56  
57  
58  
59  
60

1  
2  
3 Figure legend  
4

5 Figure 1. Consort diagram: Flow of participants throughout study  
6

7  
8 Figure 2 - Forecasting steps adapted to the study  
9  
10  
11  
12  
13  
14  
15  
16  
17  
18  
19  
20  
21  
22  
23  
24  
25  
26  
27  
28  
29  
30  
31  
32  
33  
34  
35  
36  
37  
38  
39  
40  
41  
42  
43  
44  
45  
46  
47  
48  
49  
50  
51  
52  
53  
54  
55  
56  
57  
58  
59  
60

For peer review only

1  
2  
3  
4  
5  
6  
7  
8  
9  
10  
11  
12  
13  
14  
15  
16  
17  
18  
19  
20  
21  
22  
23  
24  
25  
26  
27  
28  
29  
30  
31  
32  
33  
34  
35  
36  
37  
38  
39  
40  
41  
42  
43  
44  
45  
46  
47  
48  
49  
50  
51  
52  
53  
54  
55  
56  
57  
58  
59  
60

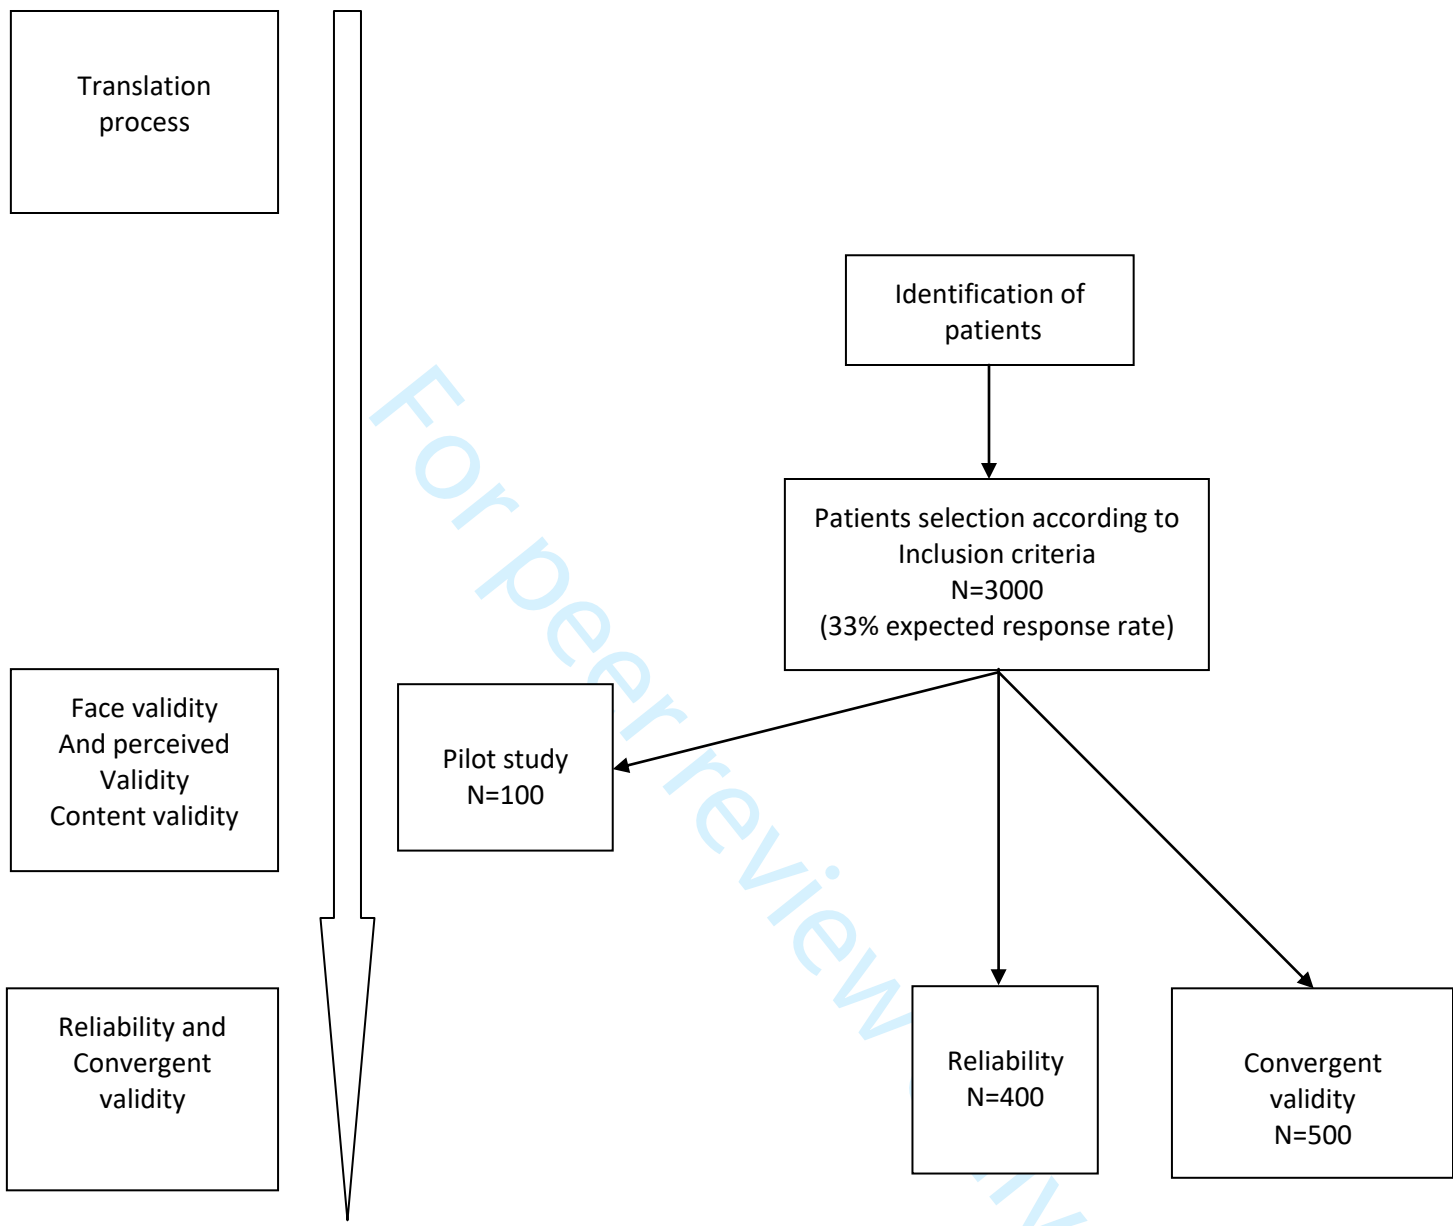

Figure 1. Consort diagram: Flow of participants throughout study

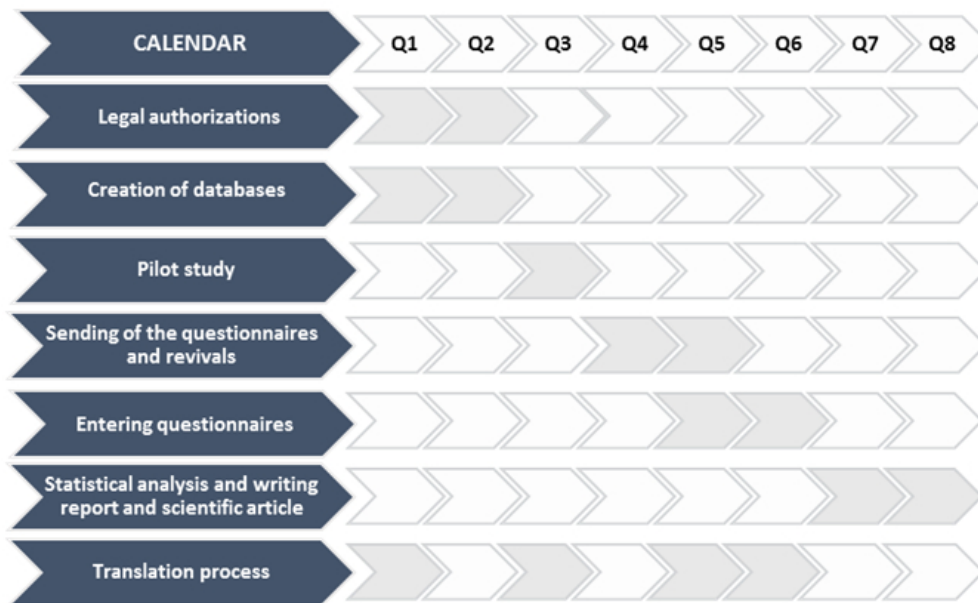

Figure 2 - Forecasting steps adapted to the study

57x34mm (300 x 300 DPI)

# BMJ Open

## **“The French LARS score”: Validation of the French version of the low anterior resection syndrome (LARS) score for measuring bowel dysfunction after sphincter-preserving surgery among rectal cancer patients: a study protocol**

|                                 |                                                                                                                                                                                                                                                                                                                                                                                                                                                                                                                                                                                                        |
|---------------------------------|--------------------------------------------------------------------------------------------------------------------------------------------------------------------------------------------------------------------------------------------------------------------------------------------------------------------------------------------------------------------------------------------------------------------------------------------------------------------------------------------------------------------------------------------------------------------------------------------------------|
| Journal:                        | <i>BMJ Open</i>                                                                                                                                                                                                                                                                                                                                                                                                                                                                                                                                                                                        |
| Manuscript ID                   | bmjopen-2019-034251.R2                                                                                                                                                                                                                                                                                                                                                                                                                                                                                                                                                                                 |
| Article Type:                   | Protocol                                                                                                                                                                                                                                                                                                                                                                                                                                                                                                                                                                                               |
| Date Submitted by the Author:   | 13-Jan-2020                                                                                                                                                                                                                                                                                                                                                                                                                                                                                                                                                                                            |
| Complete List of Authors:       | Eid, Yassine; Centre Hospitalier Universitaire de Caen, digestive surgery; UMRS 1086,<br>Bouvier, Véronique; Cancers et préventions<br>Dejardin , Olivier; Cancers et préventions<br>Menahem, Benjamin; Centre Hospitalier Universitaire de Caen<br>Chaillot, Fabien; Centre Hospitalier Universitaire de Caen<br>Chene, Yannick; Centre Hospitalier Universitaire de Caen<br>Dutheil, Jean Jacques; Centre Hospitalier Universitaire de Caen<br>Juil, Therese; Aarhus Univ Hosp<br>Morello, Rémy; Centre Hospitalier Universitaire de Caen<br>Alves, Arnaud; Centre Hospitalier Universitaire de Caen |
| <b>Primary Subject Heading</b>: | Surgery                                                                                                                                                                                                                                                                                                                                                                                                                                                                                                                                                                                                |
| Secondary Subject Heading:      | Gastroenterology and hepatology, Surgery                                                                                                                                                                                                                                                                                                                                                                                                                                                                                                                                                               |
| Keywords:                       | bowel dysfunction, rectal cancer, low anterior resection syndrome, colorectal functional outcome, quality of life, validation                                                                                                                                                                                                                                                                                                                                                                                                                                                                          |
|                                 |                                                                                                                                                                                                                                                                                                                                                                                                                                                                                                                                                                                                        |

SCHOLARONE™  
Manuscripts





I, the Submitting Author has the right to grant and does grant on behalf of all authors of the Work (as defined in the below author licence), an exclusive licence and/or a non-exclusive licence for contributions from authors who are: i) UK Crown employees; ii) where BMJ has agreed a CC-BY licence shall apply, and/or iii) in accordance with the terms applicable for US Federal Government officers or employees acting as part of their official duties; on a worldwide, perpetual, irrevocable, royalty-free basis to BMJ Publishing Group Ltd ("BMJ") its licensees and where the relevant Journal is co-owned by BMJ to the co-owners of the Journal, to publish the Work in this journal and any other BMJ products and to exploit all rights, as set out in our [licence](#).

The Submitting Author accepts and understands that any supply made under these terms is made by BMJ to the Submitting Author unless you are acting as an employee on behalf of your employer or a postgraduate student of an affiliated institution which is paying any applicable article publishing charge ("APC") for Open Access articles. Where the Submitting Author wishes to make the Work available on an Open Access basis (and intends to pay the relevant APC), the terms of reuse of such Open Access shall be governed by a Creative Commons licence – details of these licences and which [Creative Commons](#) licence will apply to this Work are set out in our licence referred to above.

Other than as permitted in any relevant BMJ Author's Self Archiving Policies, I confirm this Work has not been accepted for publication elsewhere, is not being considered for publication elsewhere and does not duplicate material already published. I confirm all authors consent to publication of this Work and authorise the granting of this licence.

1  
2  
3 **“The French LARS score”: Validation of the French version of the low anterior**  
4 **resection syndrome (LARS) score for measuring bowel dysfunction after sphincter-**  
5 **preserving surgery among rectal cancer patients: a study protocol**  
6  
7  
8  
9  
10  
11

12 Eid Y <sup>1,2,3</sup>, Bouvier V <sup>2,4</sup>, Dejardin O <sup>2,3</sup>, Menahem B<sup>1</sup>, Chaillot F<sup>3</sup>, Chene Y<sup>3</sup>, Dutheil JJ<sup>3</sup>,  
13  
14 Juul T<sup>5</sup>, Morello R<sup>3,6</sup>, Alves A<sup>1,2,3</sup>

15  
16  
17 <sup>1</sup> Department of digestive surgery, University Hospital of Caen, Avenue de la Côte de Nacre,  
18 14032, Caen, Cedex, France

19  
20 <sup>2</sup> ANTICIPE" U1086 INSERM-University of Caen Normandy, Team « Ligue contre le  
21 Cancer », Centre François Baclesse, Caen, France

22  
23 <sup>3</sup> Department of research, University Hospital of Caen, Normandy, France

24  
25 <sup>4</sup> University Hospital of Caen, Caen cedex, France; Digestive Cancer Registry of Calvados

26  
27 <sup>5</sup> Department of Surgery, Aarhus University Hospital, Aarhus, Denmark

28  
29 <sup>6</sup> Department of biostatistics and clinical research, University Hospital of Caen, 14000 Caen  
30  
31 cedex, France  
32  
33  
34  
35  
36

37 **Corresponding author**

38  
39 Dr Yassine EID – eidyassine@hotmail.fr  
40  
41  
42  
43  
44  
45  
46  
47  
48  
49  
50  
51  
52  
53  
54  
55  
56  
57  
58  
59  
60

## Abstract

**Introduction.** Many bowel problems following low anterior resection (LAR) for rectal cancer considerably impair the quality of life (QoL) of patients. The LAR Syndrome (LARS) scale is a self-report questionnaire to identify and assess bowel dysfunction after rectal cancer surgery. It has been translated and validated in several languages but not in French (metropolitan French). The primary objective is to adapt the LARS scale to the French language (called French-LARS score) and to assess its psychometric properties. Secondary objectives are to assess both the prevalence and severity of LARS and to measure their impact on QoL.

**Method and analysis.** A French multicentre observational cohort study has been designed. The validation study will include translation of the LARS scale following the current international recommendations, assessment of its reliability, convergent and discriminant validities, sensitivity, internal consistency, internal validity, and confirmatory analyses. One thousand patients will be enrolled for the analyses. The questionnaire will be initially administered to the first 100 patients in order to verify the adequacy and degree of comprehension of the questions. Then reproducibility will be investigated by a test-retest procedure in the following 400 patients.

An analysis will be conducted to determine the correlation between the LARS score and the QLQ questionnaires (EORTC's QLQ-C30, QLQ-CR29). Risk factors linked to QoL deterioration will be identified and their impact will be measured. This study will meet the need for a validated tool to improve patient care and QoL.

**Ethics and dissemination.** The institutional review board of the University Hospital of Caen and the ethics committee (CPP Nord Ouest I, January 25, 2019) approved the study. This study is supported by a grant from the French Ministry of Health (PHRC- K17-031). The

1  
2  
3 institutional promoter is the University Hospital of Caen Department of Clinical Research  
4  
5 and Innovation (DCRI).  
6

7  
8 **Trial registration number.** NCT03569488  
9

10 **Strengths and limitations of this study.**  
11

12 - The validation of the French version of the LARS score (the French-LARS score) will allow  
13 the use of a scientific instrument to assess both the prevalence and severity of LARS in  
14 French language.  
15

16  
17 - The French-LARS study is a multicentre cohort study of rectal cancer patients  
18 included from 34 units of colorectal surgery in France.  
19

20  
21 - Limitations include the use of non-probability sampling, which is expected to impose  
22 selection bias.  
23

24 **Word count of the manuscript: 4411 words**  
25

26 **Keywords:** bowel dysfunction, rectal cancer, low anterior resection syndrome, colorectal  
27  
28 functional outcome, quality of life, validation  
29  
30  
31  
32  
33  
34  
35  
36  
37  
38  
39  
40  
41  
42  
43  
44  
45  
46  
47  
48  
49  
50  
51  
52  
53  
54  
55  
56  
57  
58  
59  
60

## Manuscript

### Background

#### *Rectal cancer management*

In recent years, progress in the multimodal treatments of rectal cancer (RC) has improved local disease control and increased the survival rate (up to 50% survival at 5 years) [1, 2]. At the same time, the evolution of surgical techniques and the achievement of a 1-cm distal margin below the tumour have pushed back the limits of sphincter-preserving surgery (SPS) without impairing oncological prognosis [3, 4]. Up to 80% of patients with RC undergo SPS [5]. The assessment of RC outcome has traditionally focused on morbidity rate, tumour recurrence and survival, while functional sequelae (i.e., bowel and/or genitourinary impairment) have long been regarded as inherent to the nature of RC treatments [6, 7]. However, with improved surgical outcomes, we and others have observed a rising number of RC survivors who live with numerous potential side-effects and, eventually, an impaired quality of life (QoL) [6-9]. Therefore, bowel function, like QoL, has become an increasingly important focus of care [10].

#### *Bowel dysfunction following SPS*

It is widely accepted that as many as 50% to 90% of patients who undergo SPS will have a subsequent change in bowel habit [11, 12]. The wide spectrum of bowel symptoms after resection with SPS has been termed the "low anterior resection syndrome (LARS)". The prevalence and severity of LARS remain difficult to assess. Several authors still consider faecal incontinence to be the foremost intestinal sequela, underscoring the impact of urgency and impaired evacuation.

LARS is defined as follows: frequent bowel movements (increased number of stools during the day and/or night); clustering (repeated passage of several stools over a few hours, sometimes requiring the patient to defecate four or five times in 1–2 h); disorders of

1  
2  
3 continence from minimal gas leaks or staining to debilitating faecal incontinence and faecal  
4  
5 urgency; and urgency (inability to prevent defecation for > 15 min when the need arises) [11,  
6  
7 12]. These symptoms usually appear immediately after surgery, become most pronounced  
8  
9 during the first few months, improve somewhat thereafter, and reach a steady state after  
10  
11 approximately one to two years [11, 12]. Recently, a pragmatic definition of LARS has been  
12  
13 proposed: "disordered bowel function after rectal resection, leading to a detriment in QOL"  
14  
15 [13].  
16  
17  
18  
19  
20  
21

### 22 ***Rationale for using the LARS score***

23  
24 Although many questionnaires or instruments have been used to assess the impact of LARS  
25  
26 on QoL, a recent systematic review and meta-analysis observed that 65% of the studies  
27  
28 included did not use a validated assessment instrument [14]. Furthermore, there is a wide  
29  
30 range of assessment tools, including single examinations and different scoring systems, such  
31  
32 as the Memorial Sloan Kettering Cancer Center (MSKCC) score, the bowel function  
33  
34 instrument (BFI), and the Wexner, St. Marks and FSFI scores. Most of the instruments used  
35  
36 to assess bowel function measure faecal incontinence but leave aside other symptoms that  
37  
38 have been shown to have a more significant correlation with QoL, such as clustering and  
39  
40 urgency [15]. Since 2012, a group of Danish authors has developed and validated a 5-item  
41  
42 instrument for the evaluation of LARS: the LARS score [16]. The items are incontinence for  
43  
44 flatus or for liquid stool, frequency of bowel movements, clustering of stools, and urgency. It  
45  
46 allows the categorization of patients into three groups: no LARS (0-20 points), minor LARS  
47  
48 (21-29 points), and major LARS (30-42 points) [16]. To date, it is the best questionnaire for  
49  
50 capturing anorectal postoperative function. When faecal incontinence is the major concern,  
51  
52 the Wexner, St. Marks or FSFI scores are adequate, the latter being the most sound from a  
53  
54 methodological viewpoint. While the MSKCC-FBI is the best questionnaire for evaluating  
55  
56  
57  
58  
59  
60

1  
2  
3 LARS, its use is complex. For this reason, the LARS score is currently used preferentially for  
4 first-line evaluation [15]. Its ability to reflect the impact of bowel dysfunction on QoL was  
5 proven in its initial validation and subsequently through its association with the EORTC  
6 QLQ-C30 scale [17]. In clinical settings, its severity categories (No LARS, Minor LARS, and  
7 Major LARS) can facilitate rapid identification of patients most in need of treatment. Patients  
8 with major LARS reported seriously compromised QoL and significantly worse QoL  
9 compared with those with No/Minor LARS. Consequently, half of the patients restricted their  
10 diet and limited their social activity [17]. In addition to the original Danish version, the  
11 LARS score has been translated into English, Dutch, Swedish, Spanish, German and Chinese,  
12 and can potentially be used widely[18-20].  
13  
14  
15  
16  
17  
18  
19  
20  
21  
22  
23  
24  
25  
26  
27  
28

### 29 *Hypothesis and objectives of the investigations*

30 Both the adoption of a uniform definition of LARS and the consistent use of the same  
31 questionnaire allow researchers to pool and compare the results of different studies and  
32 institutions. . However, a validated French version of the LARS score is not yet available.  
33 The main objective therefore will be to adapt and validate the LARS scale questionnaire to  
34 the French language (called French-LARS score) and assess its psychometric properties.  
35 Secondary objectives are to assess both the prevalence and severity of LARS and to measure  
36 their impact on QoL.  
37  
38  
39  
40  
41  
42  
43  
44  
45  
46  
47  
48

### 49 **Methods**

#### 50 51 52 53 *Study design*

54 The French-LARS study is an observational, multicentre, cohort study of rectal cancer  
55 patients who have undergone curative sphincter-preserving surgery with partial or total  
56  
57  
58  
59  
60

mesorectal excision. Patients are included from 34 units of colorectal surgery in France (see list of participating centres in the Acknowledgements section). The study has been approved by the scientific board of the French Research Group of Rectal Cancer Surgery (GRECCAR). This group was created by surgical teams in France who are involved in the management of rectal cancer, with the aim of conducting and publishing multicentre clinical trials on the subject in high-level journals and expanding this surgical specialty to various learned societies. Most of the participating teams in the study are affiliated with the GRECCAR. All investigators will proceed with this study in accordance with the Declaration of Helsinki.

### ***Study population***

All patients will provide written informed consent prior to their enrolment for study participation.

The inclusion criteria are as follows: aged between 18 and 80 years (octogenarians were excluded because they suffer from significant comorbidities that exclude them from the majority clinical trials, they experience worse physical functioning compared to younger patients and third very few data are available about bowel function in octogenarians following rectal resection with nerve-sparing); rectal cancer patients who have undergone curative sphincter-preserving surgery with partial or total mesorectal excision; surgery performed between January 2007 and January 2017, with reversal of the defunctioning stoma before January 2017; bowel continuity restored for at least 24 months (including the reversal of the temporary stoma); voluntary participation in the study. The exclusion criteria are as follows: a palliative rectal cancer resection; presence of stoma; known disseminated or recurrent disease; cognition and/or language issues.

For patients lost to follow-up, an active search will be carried out with general practitioners and, if necessary, with the birth councils in order to know the vital status. Participants in the



1  
2  
3 validation study will be identified through local databases by the investigators at each of the  
4  
5 participating centres. They will be selected randomly from the pool of eligible subjects.  
6

7  
8 Participants will be approached not earlier than 24 months after surgery to allow their bowel  
9  
10 function to have regained stability [11, 12, 17].  
11  
12  
13

### 14 ***Data collected***

15  
16 Demographic and clinical information will be obtained from the databases. Patient  
17  
18 characteristics will be collected on e-CRFs (electronic Case Report Forms) and include age,  
19  
20 sex, body mass index, tumour height (distance from anal verge on MRI or rigid  
21  
22 sigmoidoscopy in centimetres), timing and type of neoadjuvant radiotherapy and  
23  
24 chemotherapy, if recommended; time since surgery; type of surgery (PME or TME); type of  
25  
26 anastomosis; defunctioning stoma; and postoperative mortality and morbidity such as pelvic  
27  
28 abscess, anastomotic leakage, and reoperation. Morbidity will be evaluated with the new  
29  
30 classification of surgical complications by Dindo et al. [21], which includes five grades. The  
31  
32 usual data will be recorded: distal and circumferential margins, the number of resected and  
33  
34 invaded nodes, tumoral differentiation, the presence of vascular emboli (venous or lymphatic,  
35  
36 intra- or extra-mural), perineural invasion, and the quality of the mesorectal excision. The  
37  
38 resected specimen will be staged according to American Joint Committee on Cancer (AJCC)  
39  
40 criteria (7th version).  
41  
42  
43  
44  
45

46 Data collection will be performed according to the following procedures. (i) The researchers  
47  
48 will identify eligible participants by reviewing the medical records of rectal cancer patients.  
49  
50 (ii) Eligible patients will be contacted by postal invitation and will be informed about the  
51  
52 purpose of the study. (iii) The completed questionnaires will be carefully checked by the  
53  
54 researchers for any missing information. Eligible patients will be contacted by postal  
55  
56 invitation twice if they do not reply. Any unclear item of missing information will be  
57  
58  
59  
60

1  
2  
3 reconfirmed through a phone call. If this is not possible, the questionnaire will be considered  
4  
5 invalid.  
6  
7  
8  
9

### 10 ***Study endpoints***

11  
12 The primary objective is to validate a French-language version of the LARS score, to adapt  
13  
14 the LARS scale questionnaire to the French language (called French-LARS score) and to  
15  
16 assess its psychometric properties and factor structure. The secondary objectives are to assess  
17  
18 both the prevalence and severity of LARS and to measure their impact on QoL.  
19  
20  
21  
22

### 23 ***Detailed description of implemented techniques***

24  
25 The validation study of the French version of the LARS score is based on face and content  
26  
27 validity as well as on the measurement of its psychometric properties, in compliance with the  
28  
29 standards published by the American Educational Research Association et al. [22].  
30  
31  
32  
33

### 34 ***Validation study of French version***

35  
36 The different steps are detailed in figure 1 and figure 2.  
37  
38  
39

### 40 ***Translation process***

41  
42 After obtaining permission from the original authors [18, 19], we will conduct the forward-  
43  
44 and back-translation procedures in accordance with the translation guidelines provided by the  
45  
46 authors. The French-LARS questionnaire will be developed by translating the questions into  
47  
48 French, a task that will be performed by two independent translators who are native French  
49  
50 speakers with a high level of fluency. The two translators will check and discuss the two  
51  
52 translations only for inconsistency and will establish a single preliminary French version.  
53  
54 Thereafter, the French version will be back-translated into English by two independent  
55  
56 professional translators; both are fluent in French and with English as their mother tongue,  
57  
58  
59  
60

1  
2  
3 and both are unfamiliar with the background objectives of the study. Both versions of the  
4  
5 backward translation will be compared with each other and with the initial version. After  
6  
7 minor adjustments, a final French version will be agreed upon. The final French version and  
8  
9 the whole translation process mentioned above will be sent to the original authors for  
10  
11 approval.  
12  
13

### 14 15 16 17 ***Content validity***

18  
19 Content validity will be assessed by a panel of experts during the process, which will lead to  
20  
21 the final French version of the scale. Using a 3-point Likert scale (poor, average and good),  
22  
23 each expert will judge independently whether the content from the original LARS score is  
24  
25 conserved and adapted in the French language (see Acknowledgements).  
26  
27  
28  
29

### 30 31 ***Face validity and perceived validity***

32  
33 Then, a pilot study will be conducted. The French LARS score will be administered to 100  
34  
35 patients in order to verify the adequacy and degree of comprehension of the questions (figure  
36  
37 1). These patients will be chosen according to their representativeness based on a wide range  
38  
39 of socio-demographic and clinical characteristics. Both male and female patients will  
40  
41 complete the questionnaire. They will have primary education levels, secondary education  
42  
43 levels, and college or higher education levels and tumour stages I, II and III.  
44  
45

46  
47 Each patient using the French-LARS score will be asked to review the questionnaire by  
48  
49 precisely pointing out all the difficulties encountered when using the instrument, including  
50  
51 the following: items that are ambiguous or poorly formulated; difficulties or confusion  
52  
53 completing the scale. They will then be asked to indicate whether the questionnaire is  
54  
55 acceptable and easy to understand.  
56  
57  
58  
59  
60

### ***Reliability***

Reproducibility will be investigated by a test-retest procedure. A randomly selected subgroup of participants (n= 400) will be sent the French-LARS score questionnaire twice (figure 1).

The second test will be sent to the participants one or two weeks after completion of the first test. Patients will be asked if they have experienced any significant change in bowel function between the first and the second test. Those confirming a change in bowel function will be excluded from the test-retest analysis. Non-responders will be further contacted twice, either via postal invitation or by phone. The test-retest study will be performed by comparing the French-LARS scores obtained at the two time points. The test-retest reliability of the questionnaire will be assessed by Cohen's Kappa coefficient (no LARS, minor LARS and major LARS scores) or by intra-class correlation coefficient, ICC (quantitative LARS score). Internal consistency will be estimated by the Cronbach alpha coefficient.

### ***Convergent validity***

Convergent validity will be determined by computing the correlations between the French-LARS score and the EORTC QLQ-C30 and QLQ-CR29 domains [23], which have been globally accepted and widely used as valid instruments for measuring QoL. Thus, eligible patients will receive a postal invitation to complete the EORTC QLQ-C30 and QLQ-CR29 along with the French-LARS scores. Furthermore, to study the convergent validity between qualitative measures of the LARS scores (no LARS, minor LARS and major LARS) and QoL, the patients will be asked a general question [16, 19]: "Overall, how much does your bowel function affect your quality of life?" Four mutually exclusive responses, "not at all", "very little", "somewhat" or "a lot", will be proposed.

### ***Discriminant validity***

1  
2  
3 Regarding the scoring instructions for these two instruments, a high score represents a high  
4 QoL or a high level of functioning for the global QoL subscale and functional subscale.  
5  
6 However, for a symptom subscale/item, the higher the score, the more severe the symptom.  
7  
8 The ability to discriminate between patients with different clinical characteristics is necessary  
9  
10 for an instrument to be considered valid. To test the tool's discriminant validity, we will use  
11  
12 known variables, including gender, age, neoadjuvant radiation therapy, distance of the  
13  
14 tumour from the anal verge, the extent of mesorectal excision (partial versus total), prior  
15  
16 temporary stoma, length of postoperative period (time since stoma-free rectal resection  
17  
18 surgery or reversal surgery from temporary stoma) and postoperative septic complications  
19  
20 such as pelvic abscess or anastomotic leakage. These variables are known to affect bowel  
21  
22 function after SPS in rectal cancer patients [11-13, 24]. The following numerical variables  
23  
24 will be changed into binary variables: age, distance of the tumour from the anal verge, and  
25  
26 length of the postoperative period. The median value for each will serve as the cut-off point.  
27  
28 Neoadjuvant radiation therapy, the extent of mesorectal excision (partial versus total), and  
29  
30 prior temporary stoma will be treated as dichotomous variables: no treatment at all versus  
31  
32 treatment. Moreover, interactions with neoadjuvant radiation therapy will be systematically  
33  
34 tested. The EORTC will provide us with and authorize our use of the French version of the  
35  
36 two questionnaires.  
37  
38  
39  
40  
41  
42  
43  
44  
45  
46

### ***Sensitivity of the items***

47  
48 A systematic search for ceiling or floor effects will be performed.  
49  
50  
51  
52

### ***Internal consistency***

53  
54 Internal consistency will be assessed using Cronbach's alpha coefficient.  
55  
56  
57  
58  
59  
60

### ***Internal validity***

A factorial analysis will allow verification of the internal structure of the scale. The statistical method used is described below.

### ***Confirmatory analysis***

A confirmatory analysis will be conducted to evaluate the recognized structural validity of the scale with regard to its first edition.

### ***Statistical analysis***

Quantitative variables will be expressed as the mean  $\pm$  standard deviation (SD), and qualitative variables will be expressed as the number of patients and percentages. The experimental design of the study leads to the same patient being seen several times during their oncology follow-up. However, apart from the subgroup of patients who participate in the study of repeatability, each patient will complete only one questionnaire in the study. Comparisons between the mean scores of the three groups (no LARS, minor LARS or major LARS) will be carried out with the help of an ANOVA or a Kruskal-Wallis test, depending on whether the data follow the verified homoscedasticity hypothesis or not. Post hoc comparisons will be performed with the Bonferroni correction or the Nemenyi test. Factor analysis will be performed with a principal component analysis. The selected factors will correspond to an eigenvalue  $\geq 1$ .

The repeatability test (test-retest), in which 400 patients will be asked to complete the F-LARSF-LARSF-LARS twice within 15 days, will be Student's *t*-test for repeated measurements, with the help of the intraclass correlation coefficient (ICC) and its 95% CI, will use ANOVA for random effects models. After estimating the various components of the

total variance, the ICC will be calculated in the usual manner. A Bland and Altman plot will be used to show the level of agreement of the repeatability test.

The sensitivity and specificity of the French-LARS score in predicting the impact on QoL will be assessed by receiver operating characteristic (ROC) curves of the score versus groups reporting no/minor or some/major impact on QoL.

The correlation between the LARS validated score and the QLQ questionnaires (EORTC's QLQ-C30, QLQ-CR29) will be estimated with the Pearson correlation coefficient as well as with the Spearman correlation coefficient and its 95% CI.

The inclusion of the data indicating the impact of LARS on QoL will be based on a univariate approach and then a multivariate approach using ad hoc models according to the nature of the dependent variable (binary or multinomial logistic regression or linear regression depending on whether the QoL score is considered qualitative or quantitative). Only variables whose level of significance in the univariate analysis is  $p < 0.15$  will be included in the multivariate model. This approach will enable the identification of the risk factors linked to a deterioration in QoL and an evaluation of their impact.

Confirmatory analysis will use structural equation models that enable the validation of the measurement structure of various concepts.

All the tests will be two-sided with a level of significance ( $p$ ) that equals 0.05. IBM®-SPSS® 22.0 and AMOS for Windows® software will be used.

### ***Patient and public involvement***

Patients were not involved in the design, the recruitment and conduct of the study. The results will be disseminated to study participants by email/paper and to the physicians who included them in the study.

### ***Feasibility***

1  
2  
3 Thirty-four colorectal cancer centres, including both university hospitals and cancer control  
4 centres, have given their consent to include between 50 and 100 patients who underwent SPS  
5  
6 from 2007 to 2017 (see the list of participating centres in the Acknowledgements section).  
7  
8

9  
10 The availability of patients for study inclusion from each GRECCAR centre has been  
11  
12 demonstrated in published randomized studies (25-28). We chose to include patients who  
13  
14 underwent SPS between 2007 and 2017 for two reasons. First, the French recommendations  
15  
16 for clinical practice and therapeutic choices for rectal cancer were published after 2007,  
17  
18 which make the diagnoses and therapeutic strategies homogeneous [10]. Second, participants  
19  
20 were approached a minimum of 24 months after surgery to allow their bowel function to have  
21  
22 regained stability [11, 18, 19]. Finally, eligible participants are usually monitored in each  
23  
24 centre at regular intervals to screen for local recurrence and/or distant metastasis. For all  
25  
26 these reasons, approximately 3000 patients will be contacted in order to include more than  
27  
28 1000 patients, expecting a 33% response rate.  
29  
30  
31  
32  
33  
34

### 35 ***Registration***

36  
37 The data will be collected and registered in e-CRFs by a dedicated local technical research  
38  
39 team using the Ennov Clinical software.  
40  
41  
42  
43

### 44 ***Study organization***

45  
46 The lead partner will be the University Hospital of Caen, France. The study will receive  
47  
48 financial support from the Program for Hospital Clinical Cancer Research “**INCa-**  
49  
50 **DGOS\_12112**”.  
51  
52  
53  
54  
55

### 56 ***Duration and timeline***



1  
2  
3 Patients will be included for 12 months. The approval protocol from the ethical committee,  
4 financial support, and e-CRFs were developed in 2018 and 2019. Recruitment of the patients  
5  
6 is planned to continue until the first semester of 2021. The database will be closed in 2021,  
7  
8 after which data analysis, manuscript writing, and submission for publication will follow  
9  
10  
11  
12 (figure 2).  
13  
14  
15  
16

### 17 ***Ethics and dissemination***

18  
19 The institutional review board of the University Hospital of Caen and the ethics committee  
20  
21 (CPP Nord Ouest I, January 25, 2019) approved the study. The French-LARS study was  
22  
23 registered on January 28, 2019, on the ClinicalTrials.gov Web site with trial identification  
24  
25 number NCT03569488. This study is supported by a grant from the French Ministry of  
26  
27 Health (PHRC- K17-031). The institutional promoter is the University Hospital of Caen  
28  
29 Department of Clinical Research and Innovation (DCRI).  
30  
31

32  
33 Results of this study will be disseminated by publication through peer-reviewed professional  
34  
35 and scientific journals. Participant data will be kept confidential and will not be shared with  
36  
37 the public. If there are requests for data sharing for appropriate research purposes, this will be  
38  
39 considered on an individual basis after trial completion and after the publication of the  
40  
41 primary manuscripts.  
42  
43  
44  
45  
46  
47  
48

### 49 **Discussion**

50  
51 Although the prevalence and severity of LARS remain difficult to assess, the LARS score,  
52  
53 which has been developed and validated for seven years, represents the best questionnaire to  
54  
55 capture anorectal postoperative function to date [15]. However, a validated French version of  
56  
57 the LARS score is not yet available. This French-LARS score will allow for the development  
58  
59  
60

1  
2  
3 of future research and clinical practice in France. LARS remains a major problem, but it is  
4  
5 not well understood among healthcare professionals, and it is frequently underestimated.  
6  
7 Furthermore, there is considerable discrepancy between the clinician's judgement of patient  
8  
9 perception and the patient's actual view or experience [25, 26]. For example, specialists tend  
10  
11 to overestimate the impact of incontinence and frequent bowel movements, while they  
12  
13 underestimate the impact of urgency and clustering [25]. Therefore, knowledge of therapeutic  
14  
15 options such as transanal irrigation, biofeedback, or sacral nerve stimulation for patients with  
16  
17 LARS is limited [27-29]. These recent studies have indicated that there is a need for  
18  
19 improved LARS education for clinicians [25, 26]. There is now evidence that both the  
20  
21 distribution of patients within different LARS groups (minor and/or major) and the impact of  
22  
23 LARS on QoL do not change over time [30]. According to recent studies [31], nearly 50% of  
24  
25 patients still experience major LARS 13 to 15 years after surgery. Interestingly, only major  
26  
27 LARS has an impact on patients' QoL [32].  
28  
29  
30  
31  
32  
33 A 2019 survey highlights the notable functional consequences reported by RC survivors after  
34  
35 SPS surgery [33]. Based on validated instruments and recent studies, 40% of RC survivors  
36  
37 suffer from major LARS symptoms at long-term follow-up that significantly impairs their  
38  
39 QoL. More interestingly, bowel dysfunction was the only predictor of QoL for such patients  
40  
41 after adjustment for age and various QoL components (urinary and sexual function) [33].  
42  
43 Clinicians will be able to use the validated French LARS score in daily clinical practice not  
44  
45 only to identify patients with elevated LARS scores but also to predict bowel dysfunction for  
46  
47 prevention and rapid management. It will hopefully lead to improved clinician awareness in  
48  
49 order to improve both the prevention and treatment of bowel dysfunction and the information  
50  
51 given to patients. In the future, we will be able to develop a new patient-led follow-up  
52  
53 programme based on symptom burden and health-related QoL. To this end, a recently  
54  
55 published nomogram, "the POLARS score", has been developed to predict bowel dysfunction  
56  
57  
58  
59  
60

1  
2  
3 severity prior to anterior resection [34]. Theoretically, it allows clinicians to personalize care  
4 during multidisciplinary team meetings, to prepare patients for the consequences of  
5 treatment, and to guide the treatment decision with patient consent. An alternative strategy  
6 for high-risk patients, called the “watch-and-wait” policy, has been proposed in cases of  
7 complete clinical response following chemo-radiation therapy. Although it leads to fewer  
8 functional problems than rectal resection, major LARS symptoms have been reported in up to  
9 one-third of these patients [35]. However, there is, to date, insufficient evidence to draw firm  
10 conclusions about the oncological safety of this approach.  
11  
12  
13  
14  
15  
16  
17  
18  
19  
20

21 In summary, the validation of the French-LARS score will allow the use of a scientific  
22 instrument to assess both the prevalence and severity of LARS. Together with oncological  
23 data, it will also form a basis on which to discuss functional outcomes with patients.  
24  
25  
26  
27  
28  
29  
30  
31  
32  
33  
34  
35  
36  
37  
38  
39  
40  
41  
42  
43  
44  
45  
46  
47  
48  
49  
50  
51  
52  
53  
54  
55  
56  
57  
58  
59  
60

**List of abbreviations**

C30: Core 30

CR 29: Colo Rectal 29

CRF: Case Report Form

DCRI: Department of Clinical Research and Innovation

eCRF: electronic Case Report Form

EORTC: European Organization for Treatment and Research of Cancer

FSFI: Female Sexual Function Index

ICC: Intraclass Correlation Coefficient

QLQ: Quality of Life Questionnaire

LARS: Low Anterior Resection Syndrome

MSKCC: Memorial Sloan Kettering Cancer Center

PME: Partial Mesorectal Excision

POLARS: Pre-Operative Low Anterior Resection Syndrome

QoL: Quality of Life

RC: Rectal Cancer

SD: Standard Deviation

SPS: Sphincter-preserving surgery

TME: Total Mesorectal Excision

### *Acknowledgements*

The authors thank Cathy Gaillard from the Clinical Research Unit of Caen University Hospital for her practical help with the study.

The authors also thank the following clinicians from the participating centres: Pr BERDAH Stéphane, Dr BEYER-BERJOT Laura, Hôpital Nord, Marseille. Pr PANIS Yves, Dr MAGGIORI Leon, CHU Beaujon, Clichy. Dr DUMONT Frédéric, Institut de Cancérologie de l'Ouest, Nantes. Dr DUBOIS Anne, CHU Estaing, Clermont-Ferrand. Pr RULLIER Eric, Dr DENOST Quentin, CHU Bordeaux Hôpital Saint André. Pr TUECH Jean-Jacques, Dr BRIDOUX Valérie, CHU de Rouen. Pr KAROUI Mehdi, Dr MANCEAU Gilles, CHU Pitié-Salpêtrière, Paris. Pr PIESSEN Guillaume, CHU Lille. Pr COTTE Eddy, CHU Lyon Sud. Dr JAFARI Merdhad, Centre Oscar Lambret, Lille. Dr DENET Christine, Institut Mutualiste Montsouris, Paris. Dr POL Bernard, Hôpital Saint Joseph, Marseille. Dr CHOULLARD Elie, CH Poissy et Saint-Germain-en-Laye. Pr BENOIST Stéphane, Pr BROUQUET Antoine, CHU de Bicêtre. Pr PARC Yann, Pr LEFEVRE Jérémie, Hôpital Saint-Antoine. Pr FAUCHERON Jean-Luc, CHU de Grenoble. Pr ROUANET Philippe, Institut Régional du Cancer, Montpellier. Dr LORIAU Jérôme, CH Saint-Joseph, Paris. Pr POCARD Marc, Dr EVENO Clarisse, Hôpital Lariboisière, Paris. Dr DESOLNEUX Grégoire Institut Bergonié, Bordeaux. Dr LAKKIS Zaher, CHU de Besançon. Pr PRUDHOMME Michel, CHU de Nîmes. Pr REGIMBEAU Jean Marc, Pr SABBAGH Charles, CHU d'Amiens. Pr OUAISSI Mehdi, CHU de Tours. Pr SIELEZNEFF Igor, Dr MEGE Diane, CHU Timone, Marseille. Dr BADIC Bogdan, CHU de Brest. Pr BRESLER Laurent, Pr, CHU Brabois Nancy. Dr BENHAIM Leonor, Institut Gustave Roussy, Villejuif. Pr MEUNIER Bernard, CHU Rennes. Pr ROHR Serge, Dr ROMAIN Benoît, CHU Hautepierre Strasbourg. Dr MARCHAL Frédéric. Institut de cancérologie de Lorraine, Nancy. Dr LELONG Bernard, Dr de

1  
2  
3 CHAISEMARTIN Cécile, Institut Paoli Calmette, Marseille. Pr BERGER Anne, Hôpital  
4 Georges POMPIDOU, Paris. Dr d'ANGELIS Nicolas, Hôpital Henri Mondor, Créteil.

5  
6 We would like to thank Frederic Bretagnol, Laurent Siproudhis, François Pigot, and Amelie  
7  
8 Anota for their help in producing the final French version of the scale.  
9  
10  
11  
12  
13

### 14 ***Contributors***

15  
16 Study conception and design: AA, VB, RM, YE. Intervention design: RM, AA, VB, YE, JJD,  
17  
18 FC, YC, JJD, BM and YE. Analysis of data will be done by YE, OD and RM.  
19

20  
21 AA drafted the work, which was revised critically for intellectual content by TJ. All authors  
22  
23 gave final approval of this version to be published.  
24  
25

### 26 ***Funding***

27  
28 The study received financial support from the Program for Hospital Clinical Cancer Research  
29  
30 “INCa-DGOS\_12112”.  
31  
32

### 33 ***Competing interests***

34  
35 None declared.  
36  
37  
38  
39  
40  
41  
42  
43  
44  
45  
46  
47  
48  
49  
50  
51  
52  
53  
54  
55  
56  
57  
58  
59  
60

## References

1. Ferlay J, Steliarova-Foucher E, Lortet-Tieulent J, Rosso S, Coebergh JW, Comber H, et al. Cancer incidence and mortality patterns in Europe: estimates for 40 countries in 2012. *Eur J Cancer*. 2013;49:1374-403.
2. Siegel RL, Miller KD, Fedewa SA, Ahnen DJ, Meester RGS, Barzi A, et al. Colorectal cancer statistics, 2017. *CA Cancer J Clin*. 2017;67:177-93.
3. Lakkis Z, Manceau G, Bridoux V, Brouquet A, Kirzin S, Maggiori L, et al. Management of rectal cancer: the 2016 French guidelines. *Colorectal Dis*. 2017;19:115-22.
4. Rullier E, Laurent C, Bretagnol F, Rullier A, Vendrely V, Zerbib F. Sphincter-saving resection for all rectal carcinomas: the end of the 2-cm distal rule. *Ann Surg*. 2005;241:465-9.
5. Chau A, Maggiori L, Debove C, Kanso F, Hennequin C, Panis Y. Toward the end of abdominoperineal resection for rectal cancer? An 8-year experience in 189 consecutive patients with low rectal cancer. *Ann Surg*. 2014;260:801-5; discussion 805-6.
6. Sarcher T, Dupont B, Alves A, Menahem B. Anterior resection syndrome: what should we tell practitioners and patients in 2018? *J Visc Surg*. 2018;155:383-91.
7. Abdelli A, Tillou X, Alves A, Menahem B. Genito-urinary sequelae after carcinological rectal resection: what to tell patients in 2017. *J Visc Surg*. 2017;154:93-104.
8. Wiltink LM, Marijnen CA, Kranenbarg EMK, van de Velde CJ, Nout RA. A comprehensive longitudinal overview of health-related quality of life and symptoms after treatment for rectal cancer in the TME trial. *Acta Oncol*. 2016;55:502-8.

- 1  
2  
3 9. Krouse RS, Wendel CS, Garcia DO, Grant M, Temple LKF, Going SB, et al. Physical  
4 activity, bowel function, and quality of life among rectal cancer survivors. *Qual Life*  
5  
6  
7  
8  
9  
10  
11 10. Alves A. Recommendations for clinical practice. Therapeutic choices for rectal  
12 cancer. How can we reduce therapeutic sequelae and preserve quality of life?  
13  
14  
15  
16  
17 11. Bryant CL, Lunniss PJ, Knowles CH, Thaha MA, Chan CL. Anterior resection  
18 syndrome. *Lancet Oncol*. 2012;13:e403-8.  
19  
20  
21 12. Ziv Y, Zbar A, Bar-Shavit Y, Igov I. Low anterior resection syndrome (LARS): cause  
22 and effect and reconstructive considerations. *Tech Coloproctol*. 2013;17:151-62.  
23  
24  
25  
26 13. Keane C, Wells C, O'Grady G, Bissett IP. Defining low anterior resection syndrome:  
27 a systematic review of the literature. *Colorectal Dis*. 2017;19:713-22.  
28  
29  
30  
31 14. Scheer AS, Boushey RP, Liang S, Doucette S, O'Connor AM, Moher D. The long-  
32 term gastrointestinal functional outcomes following curative anterior resection in  
33 adults with rectal cancer: a systematic review and meta-analysis. *Dis Colon Rectum*.  
34  
35  
36  
37  
38  
39  
40 15. Chen TY, Emmertsen KJ, Laurberg S. What are the best questionnaires to capture  
41 anorectal function after surgery in rectal cancer? *Curr Colorectal Cancer Rep*.  
42  
43  
44  
45  
46  
47 16. Emmertsen KJ, Laurberg S. Low anterior resection syndrome score: development and  
48 validation of a symptom-based scoring system for bowel dysfunction after low  
49 anterior resection for rectal cancer. *Ann Surg*. 2012;255:922-8.  
50  
51  
52  
53  
54 17. Emmertsen KJ, Laurberg S, Rectal Cancer Function Study Group. Impact of bowel  
55 dysfunction on quality of life after sphincter-preserving resection for rectal cancer. *Br*  
56  
57  
58  
59  
60  
60



- 1  
2  
3 18. Juul T, Ahlberg M, Biondo S, Emmertsen KJ, Espin E, Jimenez LM, et al.  
4  
5 International validation of the low anterior resection syndrome score. *Ann Surg.*  
6  
7 2014;259:728-34.  
8  
9
- 10 19. Juul T, Battersby NJ, Christensen P, Janjua AZ, Branagan G, Laurberg S, et al.  
11  
12 Validation of the English translation of the low anterior resection syndrome score.  
13  
14 *Colorectal Dis.* 2015;17:908-16.  
15  
16
- 17 20. Hou XT, Pang D, Lu Q, Yang P, Jin SL, Zhou YJ, et al. Validation of the Chinese  
18  
19 version of the low anterior resection syndrome score for measuring bowel dysfunction  
20  
21 after sphincter-preserving surgery among rectal cancer patients. *Eur J Oncol Nurs.*  
22  
23 2015;19:495-501.  
24  
25
- 26 21. Dindo D, Demartines N, Clavien PA. Classification of surgical complications: a new  
27  
28 proposal with evaluation in a cohort of 6336 patients and results of a survey. *Ann*  
29  
30 *Surg.* 2004;240:205-13.  
31  
32
- 33 22. American Educational Research Association, American Psychological Association,  
34  
35 National Council on Measurement in Education, Joint Committee on Standards for  
36  
37 Educational & Psychological Testing (US). *Standards for educational and*  
38  
39 *psychological testing.* Washington, DC: American Educational Research Association;  
40  
41 2014.  
42  
43
- 44 23. Wong CK, Chen J, Yu CL, Sham M, Lam CL. Systematic review recommends the  
45  
46 European organization for research and treatment of cancer colorectal cancer-specific  
47  
48 module for measuring quality of life in colorectal cancer patients. *J Clin Epidemiol.*  
49  
50 2015;68:266-78.  
51  
52
- 53 24. Hain E, Manceau G, Maggiori L, Mongin C, Prost ALDJ, Panis Y. Bowel dysfunction  
54  
55 after anastomotic leakage in laparoscopic sphincter-saving operative intervention for  
56  
57  
58  
59  
60

- 1  
2  
3 rectal cancer: a case-matched study in 46 patients using the low anterior resection  
4 score. *Surgery*. 2017;161:1028-39.  
5  
6  
7  
8 25. Chen TY, Emmertsen KJ, Laurberg S. Bowel dysfunction after rectal cancer  
9 treatment: a study comparing the specialist's versus patient's perspective. *BMJ Open*.  
10 2014;4:e003374.  
11  
12  
13  
14 26. Jimenez-Gomez LM, Espin-Basany E, Marti-Gallostra M, Sanchez-Garcia JL,  
15 Vallribera-Valls F, Armengol-Carrasco M. Low anterior resection syndrome: a survey  
16 of the members of the American Society of Colon and Rectal Surgeons (ASCRS), the  
17 Spanish Association of Surgeons (AEC), and the Spanish Society of Coloproctology  
18 (AECP). *Int J Colorectal Dis*. 2016;31:813-23.  
19  
20  
21  
22  
23  
24  
25  
26 27. Maris A, Devreese AM, D'Hoore A, Penninckx F, Staes F. Treatment options to  
27 improve anorectal function following rectal resection: a systematic review. *Colorectal*  
28  
29  
30  
31  
32  
33  
34 28. Visser WS, Te Riele WW, Boerma D, van Ramshorst B, van Westreenen HL. Pelvic  
35 floor rehabilitation to improve functional outcome after a low anterior resection: a  
36 systematic review. *Ann Coloproctol*. 2014;30:109-14.  
37  
38  
39  
40 29. Ramage L, Qiu S, Kontovounisios C, Tekkis P, Rasheed S, Tan E. A systematic  
41 review of sacral nerve stimulation for low anterior resection syndrome. *Colorectal*  
42  
43  
44  
45  
46  
47 30. Pieniowski EHA, Palmer GJ, Juul T, Lagergren P, Johar A, Emmertsen KJ, et al. Low  
48 anterior resection syndrome and quality of life after sphincter-sparing rectal cancer  
49 surgery: a long-term longitudinal follow-up. *Dis Colon Rectum*. 2019;62:14-20.  
50  
51  
52  
53 31. Chen TY, Wiltink LM, Nout RA, Kranenbarg EMK, Laurberg S, Marijnen CA, et al.  
54 Bowel function 14 years after preoperative short-course radiotherapy and total  
55  
56  
57  
58  
59  
60

- 1  
2  
3 mesorectal excision for rectal cancer: report of a multicenter randomized trial. Clin  
4  
5 Colorectal Cancer. 2015;14:106-14.  
6  
7  
8 32. Juul T, Ahlberg M, Biondo S, Espin E, Jimenez LM, Matzel KE, et al. Low anterior  
9  
10 resection syndrome and quality of life: an international multicenter study. Dis Colon  
11  
12 Rectum. 2014;57:585-91.  
13  
14  
15 33. Eid Y, Bouvier V, Menahem B, Thobie A, Dolet N, Finochi M, et al. Digestive and  
16  
17 genitourinary sequelae in rectal cancer survivors and their impact on health-related  
18  
19 quality of life: outcome of a high-resolution population-based study. Surgery. 2019;.  
20  
21 doi:10.1016/j.surg.2019.04.007.  
22  
23  
24 34. Battersby NJ, Bouliotis G, Emmertsen KJ, Juul T, Glynne-Jones R, Branagan G, et al.  
25  
26 Development and external validation of a nomogram and online tool to predict bowel  
27  
28 dysfunction following restorative rectal cancer resection: the POLARS score. Gut.  
29  
30 2018;67:688-96.  
31  
32  
33 35. Hupkens BJP, Martens MH, Stoot JH, Berbee M, Melenhorst J, Beets-Tan RG, et al.  
34  
35 Quality of life in rectal cancer patients after chemoradiation: watch-and-wait policy  
36  
37 versus standard resection - a matched-controlled study. Dis Colon Rectum.  
38  
39 2017;60:1032-40.  
40  
41  
42  
43  
44  
45  
46  
47  
48  
49  
50  
51  
52  
53  
54  
55  
56  
57  
58  
59  
60

1  
2  
3 Figure legend  
4

5 Figure 1. Consort diagram: Flow of participants throughout study  
6

7  
8 Figure 2 - Forecasting steps adapted to the study  
9  
10  
11  
12  
13  
14  
15  
16  
17  
18  
19  
20  
21  
22  
23  
24  
25  
26  
27  
28  
29  
30  
31  
32  
33  
34  
35  
36  
37  
38  
39  
40  
41  
42  
43  
44  
45  
46  
47  
48  
49  
50  
51  
52  
53  
54  
55  
56  
57  
58  
59  
60

For peer review only

1  
2  
3  
4  
5  
6  
7  
8  
9  
10  
11  
12  
13  
14  
15  
16  
17  
18  
19  
20  
21  
22  
23  
24  
25  
26  
27  
28  
29  
30  
31  
32  
33  
34  
35  
36  
37  
38  
39  
40  
41  
42  
43  
44  
45  
46  
47  
48  
49  
50  
51  
52  
53  
54  
55  
56  
57  
58  
59  
60



Figure 1. Consort diagram: Flow of participants throughout study



Figure 2 - Forecasting steps adapted to the study

57x34mm (300 x 300 DPI)
